# Supplementary material for: Identification of New QTLs for Dietary Fiber Content in Aegilops biuncialis
Source: Int J Mol Sci. 2022 Mar 30;23(7):3821. doi: 10.3390/ijms23073821 (PMC8999039; doi:10.3390/ijms23073821)
Supplement: Supplementary file 1 [file ijms-23-03821-s001.zip › Table S1.xlsx]

## Sheet: metadata
Table S1 for the publication Ivanizs et al. 'Identification of new QTLs for dietary fibre content in an Aegilops biuncialis collection through a GWAS approach'. The file contains the raw data of grain quality traits (β-glucan, total- and water extractable pentosan and protein content), which were measured in a collection of 83 Ae. biuncialis genotypes and the Mv9kr1 wheat control line for two yea…

## Sheet: Phenotypic data
Genotype	Genotype_no	Year	Replicate	β-glucan (mg/g)	TOT-pentosan (mg/g)	WE-pentosan (mg/g)	Protein (%)
AE116094	1	2016	1	35.7911	34.2133	8.97571	26.4
AE27480	2	2016	1	32.4346	36.9074	10.4966	25.8
AE35478	3	2016	1	33.0931	32.735	13.5164	23.9
AE55078	4	2016	1	35.0694	31.679	10.0317	27.2
AE75182	5	2016	1	33.2042	31.0454	11.0876	24.7
AE75490	6	2016	1	29.6658	40.4435	9.60929	33.5
AE78689	7	2016	1	42.6512	35.6512	13.0243	26.8
AE84388	8	2016	1	39.1	46.2754	13.8826	28.1
AE84484	9	2016	1	36.1053	31.151	10.5597	27.2
AE98192	10	2016	1	43.4851	50.2257	11.0609	25.5
AE99992	11	2016	1	39.1279	45.8239	9.25508	23.7
MvGB1325	12	2016	1	37.5948	33.9729	10.3837	27.3
MvGB1326	13	2016	1	37.7887	37.3589	9.14221	26.7
MvGB376	14	2016	1	31.8673	36.8532	9.2925	31
MvGB377	15	2016	1	42.3894	34.6578	11.3687	29
MvGB379	16	2016	1	40.3269	31.4678	7.91975	27.5
MvGB380	17	2016	1	29.1254	48.6827	11.9129	28.9
MvGB381	18	2016	1	54.5209	44.5663	12.4626	26.2
MvGB382	19	2016	1	39.6867	42.5056	14.2058	27
MvGB409	20	2016	1	45.0271	47.2669	10.2036	28.4
MvGB470	21	2016	1	37.3817	35.2941	10.8674	30
MvGB600	22	2016	1	36.3516	35.8847	8.15109	27.3
MvGB635	23	2016	1	39.3702	35.7926	8.47458	23.8
MvGB642	24	2016	1	22.6951	35.5705	8.61298	26.5
MvGB702	25	2016	1	41.7501	40.9409	11.6116	28.7
PI177241	26	2016	1	37.883	33.9884	10.1734	25.8
PI219797	27	2016	1	41.5962	43.7299	10.9325	27.5
PI276965	28	2016	1	30.3867	48.6828	13.4361	22.6
PI344786	29	2016	1	40.4856	43.5281	10.3093	25.4
PI349036	30	2016	1	34.1615	41.3517	9.85109	27.5
PI362334	31	2016	1	44.2837	41.6501	8.84692	23.5
PI362336	32	2016	1	35.7183	43.3699	11.4656	26.1
PI428557	33	2016	1	39.5267	34.104	10.0578	26.7
PI483007	34	2016	1	42.4431	42.6174	10.962	28
PI483013	35	2016	1	40.2823	45.1292	8.54871	27.8
PI487200	36	2016	1	32.2317	37.4062	10.075	27
PI487282	37	2016	1	37.0868	31.3295	9.82659	28.3
PI542160	38	2016	1	44.1513	43.1223	11.2445	25.5
PI542166	39	2016	1	46.4144	33.4437	10.0442	27.5
PI550932	40	2016	1	39.4323	47.0264	9.5815	25.7
PI550952	41	2016	1	34.5347	36.755	10.596	26.2
PI550965	42	2016	1	24.968	37.4172	9.8234	24.2
PI550970	43	2016	1	44.106	44.1008	9.27835	26
PI550983	44	2016	1	36.1193	42.7948	11.1354	26.6
PI550997	45	2016	1	43.2863	41.8122	10.917	26.7
PI551016	46	2016	1	39.8931	40.8277	11.5213	24.8
PI554159	47	2016	1	39.1954	34.2163	9.27152	27.6
PI554171	48	2016	1	36.5892	34.4075	11.4345	19.6
PI554176	49	2016	1	40.1921	43.8371	6.75241	26.2
PI573343	50	2016	1	43.3986	41.2664	13.3188	24.6
PI573356	51	2016	1	41.5578	37.7729	12.6638	28.5
PI614609	52	2016	1	26.6002	43.8717	8.01833	25.5
PI614611	53	2016	1	29.7784	42.2907	10.1322	21.5
TA10058	54	2016	1	34.3373	39.6247	11.3687	24.8
TA10059	55	2016	1	31.646	47.6476	12.2122	28.6
TA1957	56	2016	1	45.9305	41.9419	11.1111	25.5
TA1958	57	2016	1	33.2884	48.8124	11.2827	29.8
TA1959	58	2016	1	32.994	36.9942	11.6763	25.3
TA1960	59	2016	1	43.7042	46.4371	12.9454	30.2
TA1963	60	2016	1	41.9839	39.4816	11.1665	29.7
TA1964	61	2016	1	41.4011	49.3493	15.6156	23.5
TA1972	62	2016	1	35.6598	37.4751	9.64215	26.8
TA2000	63	2016	1	41.6741	31.9075	9.82659	26.8
TA2073	64	2016	1	41.2843	44.6035	12.5551	26.5
TA2074	65	2016	1	53.0529	37.7483	8.60927	27.1
TA2077	66	2016	1	41.1269	40.7288	10.2894	26
TA2078	67	2016	1	21.8935	41.9244	9.85109	30.5
TA2079	68	2016	1	47.427	44.2993	10.8076	27.9
TA2080	69	2016	1	34.0238	38.9662	12.1272	27.9
TA2081	70	2016	1	34.6595	43.4434	10.5105	23.9
TA2082	71	2016	1	38.3668	48.3373	9.73872	25.7
TA2083	72	2016	1	43.1502	37.0246	13.1991	26.6
TA2168	73	2016	1	36.9819	42.8725	14.6838	27.2
TA2169	74	2016	1	36.7897	41.63	17.2907	27.3
TA2349	75	2016	1	34.7168	34.1996	10.499	26.1
TA2659	76	2016	1	40.7914	39.5487	11.5202	28
TA2662	77	2016	1	42.8366	38.2159	12.1145	24.6
TA2663	78	2016	1	41.0466	48.6936	9.50119	26.3
TA2664	79	2016	1	36.6595	40.04	14.9149	27.8
TA2782	80	2016	1	22.2602	37.4751	7.25646	29.1
TA2783	81	2016	1	38.7567	39.038	7.94183	26.7
TA2784	82	2016	1	31.8259	31.7919	9.59538	23.6
TA2785	83	2016	1	32.5309	27.4428	6.86071	24.2
AE116094	1	2017	1	37.3097	39.8453	7.54352	25.3
AE27480	2	2017	1	28.251	35.4603	10.8787	27.2
AE35478	3	2017	1	30.1989	34.7015	12.8731	26.1
AE55078	4	2017	1	28.7484	43.5203	8.2205	27.8
AE75182	5	2017	1	29.4159	36.6604	9.88806	25.6
AE75490	6	2017	1	27.4616	43.7137	8.51064	33
AE78689	7	2017	1	35.012	38.153	9.98134	29.8
AE84388	8	2017	1	36.3422	38.0753	11.2971	27.9
AE84484	9	2017	1	36.0612	39.4584	9.57447	28.9
AE98192	10	2017	1	44.262	43.3269	10.5416	26.8
AE99992	11	2017	1	38.5796	40.5222	8.9942	24.9
MvGB1325	12	2017	1	34.8775	34.8326	6.79916	28.2
MvGB1326	13	2017	1	32.2068	38.4937	8.2636	26.3
MvGB376	14	2017	1	31.9849	40.0387	9.18762	30.9
MvGB377	15	2017	1	34.7427	37.3134	11.0075	28.7
MvGB379	16	2017	1	34.115	34.3327	7.44681	26.5
MvGB380	17	2017	1	29.1376	39.7765	12.6257	29
MvGB381	18	2017	1	52	48.3	11.6	26.62
MvGB382	19	2017	1	32.8798	43.41	13.7029	27.4
MvGB409	20	2017	1	42.6618	44.0176	10.5379	28.6
MvGB470	21	2017	1	33.31	42.7329	11.9255	29.7
MvGB600	22	2017	1	32.7014	34.7466	11.272	26.7
MvGB635	23	2017	1	35.0569	44.8447	9.19255	26.1
MvGB642	24	2017	1	22.5885	40.272	9.51883	27.2
MvGB702	25	2017	1	35.6538	41.2733	11.8551	29.19
PI177241	26	2017	1	30.1228	38.7866	9.10076	25.5
PI219797	27	2017	1	36.3091	45.9934	11.5258	28.9
PI276965	28	2017	1	40.5103	35.3073	9.60894	23.3
PI344786	29	2017	1	38.0184	43.4453	12.2427	25.6
PI349036	30	2017	1	29.8127	30.5028	10.9497	27.4
PI362334	31	2017	1	41.5729	52.795	13.7888	26.8
PI362336	32	2017	1	37.9245	50.1863	12.9193	25.5
PI428557	33	2017	1	35.4898	39.1116	8.77573	26.2
PI483007	34	2017	1	37.7044	34.728	8.78661	28.2
PI483013	35	2017	1	37.2864	41.4685	9.10031	29.2
PI487200	36	2017	1	30.6239	35.1262	11.5258	28.8
PI487282	37	2017	1	33.0431	40.3034	10.8342	29.4
PI542160	38	2017	1	39.8395	31.3668	9.73451	26.2
PI542166	39	2017	1	41.1418	39.0364	9.93117	27.7
PI550932	40	2017	1	33.5506	42.6816	10.7263	26.1
PI550952	41	2017	1	29.6875	39.459	10.3545	26.5
PI550965	42	2017	1	30.0897	37.3134	9.23507	25.1
PI550970	43	2017	1	42.4097	37.9888	9.8324	26.2
PI550983	44	2017	1	34.9994	36.7748	7.86627	25.2
PI550997	45	2017	1	35.9638	37.0698	10.2262	26
PI551016	46	2017	1	39.2868	42.364	11.7155	24.9
PI554159	47	2017	1	28.3091	36.9715	7.57129	25.6
PI554171	48	2017	1	34.8201	32.2222	10.8889	22.8
PI554176	49	2017	1	34.0004	38.5291	7.9034	25.3
PI573343	50	2017	1	41.393	40.2163	10.5211	26.3
PI573356	51	2017	1	38.1224	33.9233	12.1927	27.5
PI614609	52	2017	1	23.3112	40.7367	9.42579	26
PI614611	53	2017	1	25.7801	40.7821	10.3911	24.5
TA10058	54	2017	1	30.5169	31.7164	9.32836	26.1
TA10059	55	2017	1	27.5157	39.607	12.3061	32.8
TA1957	56	2017	1	40.6817	37.5388	10.8583	25.5
TA1958	57	2017	1	29.2446	42.5365	11.3356	28.6
TA1959	58	2017	1	29.1971	43.4453	10.5092	27.8
TA1960	59	2017	1	36.4323	46.1279	11.2233	29.8
TA1963	60	2017	1	36.9882	43.1056	12.2981	29.2
TA1964	61	2017	1	34.8539	42.5026	16.046	28.7
TA1972	62	2017	1	31.3244	37.0217	11.0651	26.9
TA2000	63	2017	1	44.5291	41.9285	9.9675	25.9
TA2073	64	2017	1	38.1377	46.8323	12.0497	26.3
TA2074	65	2017	1	49.592	37.8731	7.3694	26
TA2077	66	2017	1	37.8706	40.5049	11.5258	27.3
TA2078	67	2017	1	24.8464	41.5642	11.7318	28.9
TA2079	68	2017	1	39.8985	40.404	10.3255	27.1
TA2080	69	2017	1	34.1897	41.4685	12.7198	28.2
TA2081	70	2017	1	29.6317	42.7003	13.0626	25.6
TA2082	71	2017	1	39.1073	45.679	11.4478	27.1
TA2083	72	2017	1	36.5175	45.4545	13.8047	27.6
TA2168	73	2017	1	34.2988	42.7003	15.4654	27.2
TA2169	74	2017	1	32.8488	43.354	14.7702	26.8
TA2349	75	2017	1	33.8507	33.5556	10.7778	26.5
TA2659	76	2017	1	37.0186	38.3838	10.101	28.1
TA2662	77	2017	1	35.7368	33.4078	13.6313	27.4
TA2663	78	2017	1	36.2855	43.4343	11.3356	25.6
TA2664	79	2017	1	34.4466	39.8139	15.6494	28.2
TA2782	80	2017	1	19.4586	40	7.95031	30.7
TA2783	81	2017	1	40.8704	44.22	8.64198	26.3
TA2784	82	2017	1	32.6969	43.5536	8.66739	25.4
TA2785	83	2017	1	34.2203	39.2222	7.11111	28.4
AE116094	1	2016	2	36.2938	29.5671	9.3981	26.41
AE27480	2	2016	2	32.5289	37.1332	11.6253	25.77
AE35478	3	2016	2	34.0722	32.6294	13.1996	23.92
AE55078	4	2016	2	33.1271	30.095	10.5597	27.22
AE75182	5	2016	2	35.2602	33.3685	11.1932	24.73
AE75490	6	2016	2	30.9303	41.3939	10.5597	33.47
AE78689	7	2016	2	42.4533	37.3068	12.0309	26.86
AE84388	8	2016	2	40.7798	48.5327	13.3183	28.05
AE84484	9	2016	2	37.1	33.0517	10.6653	27.16
AE98192	10	2016	2	43.9804	48.4199	12.8668	25.55
AE99992	11	2016	2	41.6336	45.1467	9.02935	23.7
MvGB1325	12	2016	2	38.2061	34.0858	11.7381	27.26
MvGB1326	13	2016	2	41.1167	37.6975	8.80361	26.74
MvGB376	14	2016	2	32.8986	33.6853	9.2925	31.06
MvGB377	15	2016	2	42.1914	34.3267	12.1413	29.05
MvGB379	16	2016	2	42.6149	28.4055	8.44773	27.43
MvGB380	17	2016	2	30.3032	49.7136	12.0275	28.92
MvGB381	18	2016	2	53.9768	49.7507	13.0608	26.18
MvGB382	19	2016	2	39.6867	45.302	14.877	26.99
MvGB409	20	2016	2	44.4131	50.268	10.7181	28.4
MvGB470	21	2016	2	37.809	38.2851	10.7677	29.95
MvGB600	22	2016	2	38.1394	35.0895	7.85288	27.36
MvGB635	23	2016	2	39.8163	35.4935	8.77368	23.77
MvGB642	24	2016	2	24.0547	36.2416	9.28412	26.51
MvGB702	25	2016	2	44.7552	43.4434	11.8118	28.77
PI177241	26	2016	2	37.2024	30.7514	9.59538	25.77
PI219797	27	2016	2	44.0311	45.9807	10.8253	27.45
PI276965	28	2016	2	32.9112	50.8194	13.6564	22.6
PI344786	29	2016	2	42.3347	43.1844	9.62199	25.39
PI349036	30	2016	2	34.9111	42.7262	11.3402	27.45
PI362334	31	2016	2	48.53	40.3579	8.4493	23.42
PI362336	32	2016	2	36.0865	42.2732	11.7647	26.07
PI428557	33	2016	2	39.8902	36.0694	9.82659	26.68
PI483007	34	2016	2	42.5437	39.4855	11.2975	28
PI483013	35	2016	2	42.491	45.1292	8.54871	27.85
PI487200	36	2016	2	33.7409	37.0847	10.6109	27.01
PI487282	37	2016	2	38.4978	32.8324	10.0578	28.22
PI542160	38	2016	2	46.6609	41.7031	11.7904	25.52
PI542166	39	2016	2	46.8162	36.5342	10.4857	27.45
PI550932	40	2016	2	40.7987	46.0352	9.36123	25.72
PI550952	41	2016	2	34.9227	36.2031	10.9272	26.16
PI550965	42	2016	2	28.0663	38.3002	10.2649	24.18
PI550970	43	2016	2	43.6093	42.8408	10.3093	26.05
PI550983	44	2016	2	37.8489	42.0306	11.0262	26.56
PI550997	45	2016	2	44.9512	39.5197	10.917	26.72
PI551016	46	2016	2	42.8717	39.4855	11.2975	24.76
PI554159	47	2016	2	38.5008	33.3333	8.60927	27.62
PI554171	48	2016	2	37.4527	34.6154	12.0582	19.61
PI554176	49	2016	2	39.3324	42.7653	6.85959	26.2
PI573343	50	2016	2	42.9803	41.7031	13.2096	24.62
PI573356	51	2016	2	42.0734	34.607	12.5546	28.52
PI614609	52	2016	2	26.8183	43.5281	8.01833	25.55
PI614611	53	2016	2	30.2408	44.9339	9.69163	21.48
TA10058	54	2016	2	36.2883	34.6578	11.9205	24.76
TA10059	55	2016	2	30.5434	46.9469	12.1121	28.64
TA1957	56	2016	2	45.8222	47.5475	11.5115	25.52
TA1958	57	2016	2	32.9631	47.5059	11.1639	29.83
TA1959	58	2016	2	32.2241	36.5318	10.7514	25.34
TA1960	59	2016	2	43.3813	47.1496	13.3017	30.24
TA1963	60	2016	2	39.2258	39.1825	13.659	29.74
TA1964	61	2016	2	40.3142	47.9479	15.1151	23.47
TA1972	62	2016	2	36.4232	38.7674	10.6362	26.81
TA2000	63	2016	2	41.8883	32.0231	11.4451	26.76
TA2073	64	2016	2	46.8789	42.8414	12.2247	26.51
TA2074	65	2016	2	53.4594	40.6181	8.71965	27.1
TA2077	66	2016	2	41.3462	39.8714	10.1822	26.05
TA2078	67	2016	2	23.2818	42.4971	10.4238	30.53
TA2079	68	2016	2	48.4852	45.6057	11.0451	27.92
TA2080	69	2016	2	37.0983	38.9662	13.2207	27.89
TA2081	70	2016	2	34.3491	41.2412	10.5105	23.96
TA2082	71	2016	2	39.6392	51.1876	9.50119	25.71
TA2083	72	2016	2	43.5488	38.0313	13.1991	26.64
TA2168	73	2016	2	37.1735	47.0525	15.0054	27.26
TA2169	74	2016	2	36.6864	45.1542	15.4185	27.28
TA2349	75	2016	2	35.275	37.9418	11.9543	26.06
TA2659	76	2016	2	40.9934	39.6675	12.8266	28.02
TA2662	77	2016	2	44.8811	37.6652	12.2247	24.66
TA2663	78	2016	2	41.0466	49.6437	11.0451	26.36
TA2664	79	2016	2	36.3523	38.7387	14.1141	27.75
TA2782	80	2016	2	23.3053	37.9722	7.15706	29.11
TA2783	81	2016	2	41.0482	42.5056	8.38926	26.77
TA2784	82	2016	2	32.2822	32.948	8.67052	23.54
TA2785	83	2016	2	32.9647	29.9376	7.90021	24.16
AE116094	1	2017	2	37.7955	39.6518	7.83366	25.33
AE27480	2	2017	2	28.8458	37.3431	10.9833	27.15
AE35478	3	2017	2	32.5435	39.459	15.2985	26.11
AE55078	4	2017	2	28.6509	43.4236	8.70406	27.78
AE75182	5	2017	2	30.7662	36.4739	10.7276	25.52
AE75490	6	2017	2	26.7496	41.2959	8.31721	32.99
AE78689	7	2017	2	35.748	35.1679	9.79478	29.87
AE84388	8	2017	2	37.8076	37.5523	11.9247	27.91
AE84484	9	2017	2	39.1259	36.4603	8.51064	28.9
AE98192	10	2017	2	45.1841	46.8085	9.96132	26.83
AE99992	11	2017	2	39.0899	38.1044	8.41393	24.95
MvGB1325	12	2017	2	35.1879	37.9707	7.32218	28.16
MvGB1326	13	2017	2	34.0782	33.4728	8.4728	26.33
MvGB376	14	2017	2	32.7896	37.0406	8.89749	30.98
MvGB377	15	2017	2	36.5143	34.8881	11.7537	28.77
MvGB379	16	2017	2	36.9328	35.4932	7.44681	26.45
MvGB380	17	2017	2	30.1819	35.6425	12.7374	29.04
MvGB381	18	2017	2	51.1	49.6	12.3	26.69
MvGB382	19	2017	2	34.3476	42.5732	13.8075	27.39
MvGB409	20	2017	2	42.3434	45.1153	10.3183	28.59
MvGB470	21	2017	2	35.1052	48.5714	12.0497	29.75
MvGB600	22	2017	2	33.3909	31.7477	9.92761	26.71
MvGB635	23	2017	2	37.1875	39.2547	9.31677	26.08
MvGB642	24	2017	2	24.1572	37.6569	9.62343	27.15
MvGB702	25	2017	2	35.6538	42.8101	11.9649	29.26
PI177241	26	2017	2	30.4365	38.0282	9.2091	25.52
PI219797	27	2017	2	37.6375	49.9451	10.2086	28.89
PI276965	28	2017	2	40.9055	37.4302	10.5028	23.31
PI344786	29	2017	2	41.32	44.9621	15.0596	25.61
PI349036	30	2017	2	31.1446	32.514	12.514	27.42
PI362334	31	2017	2	42.6722	46.2112	13.4161	26.83
PI362336	32	2017	2	37.8277	50.9317	12.6708	25.46
PI428557	33	2017	2	35.2881	34.8862	9.2091	26.18
PI483007	34	2017	2	38.624	35.251	8.78661	28.27
PI483013	35	2017	2	38.9949	39.8139	9.20372	29.22
PI487200	36	2017	2	30.6239	35.3458	11.1965	28.81
PI487282	37	2017	2	34.6027	40.7367	10.4009	29.42
PI542160	38	2017	2	40.7292	34.3166	11.4061	26.23
PI542166	39	2017	2	41.8275	36.7748	10.7178	27.75
PI550932	40	2017	2	34.8482	45.5866	11.2849	26.1
PI550952	41	2017	2	31.2073	39.2724	8.67537	26.57
PI550965	42	2017	2	28.9405	37.0336	7.46269	25.13
PI550970	43	2017	2	44.4734	39.1061	11.1732	26.17
PI550983	44	2017	2	35.8086	36.7748	8.55457	25.26
PI550997	45	2017	2	37.2257	37.6598	10.0295	26.04
PI551016	46	2017	2	40.458	38.1799	11.4017	24.9
PI554159	47	2017	2	29.8646	36.2832	7.76794	25.62
PI554171	48	2017	2	36.1742	32.3333	10.2222	22.82
PI554176	49	2017	2	33.9075	39.0779	8.23271	25.28
PI573343	50	2017	2	42.7518	44.0511	11.2094	26.3
PI573356	51	2017	2	38.6294	38.2498	11.1111	27.53
PI614609	52	2017	2	23.8989	34.2362	8.55905	26.04
PI614611	53	2017	2	26.1782	42.4581	9.05028	24.47
TA10058	54	2017	2	32.97	34.3284	11.6604	26.11
TA10059	55	2017	2	30.3904	46.122	12.9266	32.82
TA1957	56	2017	2	42.0561	35.5739	12.4095	25.46
TA1958	57	2017	2	30.953	46.2402	11.56	28.66
TA1959	58	2017	2	29.0913	40.6284	10.1842	27.86
TA1960	59	2017	2	36.8597	51.9641	10.7744	29.82
TA1963	60	2017	2	36.9882	44.0994	13.0435	29.18
TA1964	61	2017	2	36.6883	42.7094	15.7392	28.74
TA1972	62	2017	2	31.9081	35.4705	11.8925	26.93
TA2000	63	2017	2	45.2573	39.0033	10.0758	25.87
TA2073	64	2017	2	37.5796	50.3106	13.5404	26.3
TA2074	65	2017	2	50.5277	40.0187	6.71642	26.05
TA2077	66	2017	2	38.3729	43.2492	12.2942	27.33
TA2078	67	2017	2	25.6577	37.8771	11.7318	28.9
TA2079	68	2017	2	40.8169	46.9136	10.5499	27.14
TA2080	69	2017	2	35.7205	40.2275	12.7198	28.25
TA2081	70	2017	2	32.4448	41.0538	12.2942	25.66
TA2082	71	2017	2	40.9122	48.4848	11.3356	27.11
TA2083	72	2017	2	37.552	47.9237	13.0191	27.62
TA2168	73	2017	2	35.2175	43.9078	14.7947	27.23
TA2169	74	2017	2	33.5849	44.3478	13.7702	26.82
TA2349	75	2017	2	35.2811	38.1111	11.2222	26.49
TA2659	76	2017	2	37.1192	39.5062	11.2233	28.16
TA2662	77	2017	2	36.3749	33.6313	12.7374	27.41
TA2663	78	2017	2	38.3846	42.5365	10.8866	25.62
TA2664	79	2017	2	34.6486	36.8149	15.1235	28.16
TA2782	80	2017	2	19.4586	38.1366	7.70186	30.7
TA2783	81	2017	2	41.1472	50.3928	8.75421	26.32
TA2784	82	2017	2	33.4848	39.1116	8.88407	25.41
TA2785	83	2017	2	36.9701	34	7	28.39
AE116094	1	2016	3	34.9421	28.6167	8.13094	26.37
AE27480	2	2016	3	32.773	43.5666	9.25508	25.78
AE35478	3	2016	3	33.7195	29.2503	13.094	23.88
AE55078	4	2016	3	33.1694	33.8965	9.82049	27.17
AE75182	5	2016	3	33.5861	34.8469	11.9324	24.75
AE75490	6	2016	3	29.5686	38.6484	10.3485	33.48
AE78689	7	2016	3	41.6012	35.3201	11.5894	26.83
AE84388	8	2016	3	39.2107	47.7427	12.8668	28.07
AE84484	9	2016	3	37.7833	35.2693	10.6653	27.18
AE98192	10	2016	3	42.9683	48.5327	11.1738	25.53
AE99992	11	2016	3	40.3227	49.0971	10.3837	23.75
MvGB1325	12	2016	3	37.1866	36.456	9.93228	27.32
MvGB1326	13	2016	3	40.0211	37.1332	9.81941	26.77
MvGB376	14	2016	3	33.422	34.3189	9.2925	31.04
MvGB377	15	2016	3	43.2298	36.2031	11.9205	29.02
MvGB379	16	2016	3	41.0183	32.8405	8.76452	27.47
MvGB380	17	2016	3	29.3813	51.6609	12.2566	28.85
MvGB381	18	2016	3	54.2889	44.8654	12.2632	26.25
MvGB382	19	2016	3	39.9901	43.6242	14.4295	26.96
MvGB409	20	2016	3	43.6674	48.1243	9.86066	28.44
MvGB470	21	2016	3	36.8662	38.6839	10.9671	29.96
MvGB600	22	2016	3	37.6004	33.3996	7.95229	27.33
MvGB635	23	2016	3	37.1407	36.989	8.77368	23.81
MvGB642	24	2016	3	23.7076	34.1163	9.0604	26.47
MvGB702	25	2016	3	42.8826	44.2442	12.8128	28.73
PI177241	26	2016	3	37.1214	30.0578	8.3237	25.85
PI219797	27	2016	3	40.8733	44.373	10.2894	27.47
PI276965	28	2016	3	29.4444	51.7093	14.4273	22.65
PI344786	29	2016	3	42.2291	43.8717	9.73654	25.34
PI349036	30	2016	3	34.6859	42.6117	9.50745	27.48
PI362334	31	2016	3	42.7619	42.9423	8.64811	23.46
PI362336	32	2016	3	35.778	41.0768	11.1665	26.13
PI428557	33	2016	3	39.324	32.6012	9.71098	26.71
PI483007	34	2016	3	43.1006	44.2953	12.7517	27.97
PI483013	35	2016	3	42.1208	43.7376	8.05169	27.87
PI487200	36	2016	3	31.7956	38.5852	10.075	27.05
PI487282	37	2016	3	37.1245	32.3699	10.1734	28.25
PI542160	38	2016	3	42.0152	41.3755	13.4279	25.56
PI542166	39	2016	3	44.0657	34.6578	10.2649	27.52
PI550932	40	2016	3	36.937	46.0352	9.47137	25.71
PI550952	41	2016	3	34.6846	33.3333	9.93377	26.17
PI550965	42	2016	3	27.2615	39.404	11.5894	24.24
PI550970	43	2016	3	43.8152	45.4754	10.4238	26.02
PI550983	44	2016	3	36.7665	44.5415	9.9345	26.61
PI550997	45	2016	3	42.8317	44.1048	11.1354	26.72
PI551016	46	2016	3	39.4606	44.9664	11.2975	24.83
PI554159	47	2016	3	37.5018	33.3333	8.83002	27.57
PI554171	48	2016	3	37.3638	35.1351	12.474	19.65
PI554176	49	2016	3	39.7969	44.2658	6.32369	26.22
PI573343	50	2016	3	42.7668	42.0306	13.3188	24.64
PI573356	51	2016	3	41.0586	35.8079	12.4454	28.56
PI614609	52	2016	3	26.355	43.8717	7.90378	25.49
PI614611	53	2016	3	30.1068	45.5947	10.1322	21.51
TA10058	54	2016	3	35.2884	35.4305	11.2583	24.77
TA10059	55	2016	3	30.0871	47.5475	12.5125	28.61
TA1957	56	2016	3	44.6702	45.8458	10.5105	25.47
TA1958	57	2016	3	35.6496	47.5059	10.4513	29.79
TA1959	58	2016	3	31.8829	33.6416	10.0578	25.29
TA1960	59	2016	3	43.013	47.0309	11.4014	30.25
TA1963	60	2016	3	39.9537	41.0768	11.9641	29.71
TA1964	61	2016	3	40.4464	47.9479	15.015	23.44
TA1972	62	2016	3	33.933	39.0656	10.7356	26.77
TA2000	63	2016	3	41.5057	34.7977	9.9422	26.82
TA2073	64	2016	3	41.3569	41.2996	12.2247	26.49
TA2074	65	2016	3	53.5745	40.7285	7.94702	27.15
TA2077	66	2016	3	39.731	40.1929	10.7181	25.99
TA2078	67	2016	3	23.1928	45.2463	9.96564	30.51
TA2079	68	2016	3	46.0697	48.9311	9.97625	27.86
TA2080	69	2016	3	34.5765	39.5626	12.4254	27.95
TA2081	70	2016	3	35.5674	41.1411	11.8118	23.89
TA2082	71	2016	3	39.9843	49.4062	9.73872	25.72
TA2083	72	2016	3	41.8173	39.3736	13.4228	26.67
TA2168	73	2016	3	38.37	47.1597	15.5413	27.19
TA2169	74	2016	3	37.1182	45.4846	13.7665	27.25
TA2349	75	2016	3	35.2195	35.1351	9.56341	26.04
TA2659	76	2016	3	40.2181	41.0926	13.1829	28.06
TA2662	77	2016	3	39.9125	38.326	12.0044	24.63
TA2663	78	2016	3	39.6741	47.3872	9.38242	26.33
TA2664	79	2016	3	33.1123	39.7397	12.3123	27.81
TA2782	80	2016	3	22.7816	37.8728	6.66004	29.07
TA2783	81	2016	3	42.3537	42.8412	7.94183	26.73
TA2784	82	2016	3	31.3115	33.4104	8.90173	23.59
TA2785	83	2016	3	31.5947	29.3139	7.48441	24.18
AE116094	1	2017	3	36.5517	44.294	7.54352	25.28
AE27480	2	2017	3	28.503	37.6569	9.62343	27.17
AE35478	3	2017	3	32.4338	34.7015	12.5933	26.13
AE55078	4	2017	3	28.5301	42.7466	9.67118	27.75
AE75182	5	2017	3	29.9148	34.7948	9.88806	25.55
AE75490	6	2017	3	26.6735	45.7447	8.60735	33.02
AE78689	7	2017	3	35.9864	37.8731	11.7537	29.83
AE84388	8	2017	3	36.7659	35.6695	10.4603	27.93
AE84484	9	2017	3	35.5402	38.1044	8.70406	28.92
AE98192	10	2017	3	41.6557	41.9729	11.1219	26.78
AE99992	11	2017	3	37.2674	38.2979	8.02708	24.91
MvGB1325	12	2017	3	34.6681	34.9372	7.11297	28.19
MvGB1326	13	2017	3	33.779	32.9498	7.84519	26.32
MvGB376	14	2017	3	31.9959	39.5551	8.2205	30.95
MvGB377	15	2017	3	34.2742	34.8881	9.70149	28.73
MvGB379	16	2017	3	35.5921	39.5551	7.44681	26.49
MvGB380	17	2017	3	28.2681	34.7486	14.6369	29.03
MvGB381	18	2017	3	50.6	49.9	11.2	26.65
MvGB382	19	2017	3	33.5305	45.8159	14.1213	27.44
MvGB409	20	2017	3	42.0734	43.5785	10.3183	28.56
MvGB470	21	2017	3	34.6372	48.5714	12.4224	29.77
MvGB600	22	2017	3	33.2126	37.7456	9.20372	26.66
MvGB635	23	2017	3	36.122	40.7453	11.0559	26.05
MvGB642	24	2017	3	22.828	35.4603	8.3682	27.21
MvGB702	25	2017	3	34.8268	40.5049	11.5258	29.24
PI177241	26	2017	3	30.4456	39.9783	9.31744	25.57
PI219797	27	2017	3	36.8777	47.5302	10.4281	28.93
PI276965	28	2017	3	39.8772	35.3073	10.2793	23.27
PI344786	29	2017	3	39.6214	46.5872	13.5428	25.64
PI349036	30	2017	3	30.2894	31.3966	11.3966	27.44
PI362334	31	2017	3	42.2844	49.9379	11.9255	26.78
PI362336	32	2017	3	37.3047	51.6646	12.2981	25.47
PI428557	33	2017	3	35.6631	36.2947	10.8342	26.15
PI483007	34	2017	3	37.8783	40.3766	9.51883	28.22
PI483013	35	2017	3	37.4435	41.1582	9.72079	29.23
PI487200	36	2017	3	31.2873	37.5412	11.1965	28.83
PI487282	37	2017	3	32.2491	41.6035	10.1842	29.41
PI542160	38	2017	3	40.0883	30.8751	11.2094	26.18
PI542166	39	2017	3	41.6104	41.5929	9.43953	27.69
PI550932	40	2017	3	34.7017	43.352	11.2849	26.13
PI550952	41	2017	3	30.6511	34.4216	9.32836	26.52
PI550965	42	2017	3	28.178	34.7948	7.83582	25.11
PI550970	43	2017	3	42.1887	37.095	10.3911	26.19
PI550983	44	2017	3	35.8114	40.3147	7.57129	25.24
PI550997	45	2017	3	35.8776	40.413	10.0295	26.03
PI551016	46	2017	3	40.6164	43.7238	10.5649	24.88
PI554159	47	2017	3	28.3187	37.5615	8.6529	25.66
PI554171	48	2017	3	35.1418	33.8889	10.7778	22.78
PI554176	49	2017	3	33.7069	40.1756	7.9034	25.35
PI573343	50	2017	3	43.8619	40.5113	11.5044	26.34
PI573356	51	2017	3	37.9511	39.0364	12.1927	27.48
PI614609	52	2017	3	23.9048	39.0033	8.34236	25.97
PI614611	53	2017	3	26.6499	35.9777	8.15642	24.49
TA10058	54	2017	3	30.7303	37.9664	9.79478	26.15
TA10059	55	2017	3	29.5297	46.9493	13.3402	32.81
TA1957	56	2017	3	42.6053	38.6763	10.7549	25.46
TA1958	57	2017	3	28.6928	47.8114	10.5499	28.63
TA1959	58	2017	3	29.586	39.7616	12.4594	27.85
TA1960	59	2017	3	36.0475	50.6173	11.1111	29.78
TA1963	60	2017	3	36.8255	49.441	12.9193	29.17
TA1964	61	2017	3	35.0782	43.1231	14.5812	28.77
TA1972	62	2017	3	30.7493	40.1241	11.3754	26.91
TA2000	63	2017	3	44.8963	42.0368	10.4009	25.93
TA2073	64	2017	3	36.4907	47.7019	13.1677	26.27
TA2074	65	2017	3	49.6283	37.9664	8.02239	26.01
TA2077	66	2017	3	38.6769	40.1756	11.416	27.36
TA2078	67	2017	3	24.7163	39.2179	11.5084	28.88
TA2079	68	2017	3	41.4177	40.7407	10.6622	27.09
TA2080	69	2017	3	34.6581	41.365	12.8232	28.22
TA2081	70	2017	3	29.54	39.9561	12.404	25.65
TA2082	71	2017	3	39.3679	50.8418	11.1111	27.05
TA2083	72	2017	3	36.3544	47.0258	13.6925	27.64
TA2168	73	2017	3	35.3685	44.8957	15.6608	27.19
TA2169	74	2017	3	31.9295	49.8137	16.8944	26.85
TA2349	75	2017	3	33.8066	35.4444	11.3333	26.44
TA2659	76	2017	3	36.6971	39.9551	10.2132	28.13
TA2662	77	2017	3	35.574	35.1955	12.6257	27.37
TA2663	78	2017	3	36.6588	46.4646	10.101	25.66
TA2664	79	2017	3	33.7676	36.091	14.7187	28.22
TA2782	80	2017	3	19.1151	41.118	7.82609	30.75
TA2783	81	2017	3	39.2824	44.4444	9.31538	26.3
TA2784	82	2017	3	33.1515	41.1701	8.55905	25.44
TA2785	83	2017	3	33.4292	36.2222	8.11111	28.41
AE116094	1	2016	4	34.8472	27.6663	8.02534	26.39
AE27480	2	2016	4	33.8999	43.228	9.48081	25.81
AE35478	3	2016	4	33.9095	31.7846	12.9884	23.86
AE55078	4	2016	4	34.9752	28.9335	11.0876	27.19
AE75182	5	2016	4	35.6972	33.0517	11.4044	24.71
AE75490	6	2016	4	30.9033	37.3812	10.3485	33.49
AE78689	7	2016	4	42.3366	36.6446	11.6998	26.85
AE84388	8	2016	4	39.4198	46.5011	12.4153	28.05
AE84484	9	2016	4	38.166	33.5797	10.5597	27.21
AE98192	10	2016	4	46.7425	49.6614	10.9481	25.57
AE99992	11	2016	4	41.4206	44.1309	10.158	23.72
MvGB1325	12	2016	4	38.0294	37.3589	10.9481	27.29
MvGB1326	13	2016	4	41.6886	37.3589	10.6095	26.71
MvGB376	14	2016	4	32.5576	31.4678	9.5037	30.99
MvGB377	15	2016	4	43.325	34.5475	12.0309	28.98
MvGB379	16	2016	4	43.0889	29.5671	9.5037	27.44
MvGB380	17	2016	4	30.7068	53.0355	12.142	28.89
MvGB381	18	2016	4	56.8487	48.5543	12.662	26.21
MvGB382	19	2016	4	42.1601	42.17	14.5414	27.01
MvGB409	20	2016	4	43.4451	48.4459	9.6463	28.38
MvGB470	21	2016	4	36.9595	34.0977	11.0668	30.02
MvGB600	22	2016	4	37.8965	36.8787	8.05169	27.36
MvGB635	23	2016	4	41.1981	35.5932	9.17248	23.79
MvGB642	24	2016	4	24.5322	35.2349	8.61298	26.44
MvGB702	25	2016	4	42.6587	43.8438	11.4114	28.76
PI177241	26	2016	4	37.3499	30.6358	10.4046	25.79
PI219797	27	2016	4	41.9691	43.0868	10.8253	27.52
PI276965	28	2016	4	29.5438	50.7004	13.9868	22.58
PI344786	29	2016	4	44.5865	41.2371	11.1111	25.37
PI349036	30	2016	4	36.0733	41.9244	9.73654	27.51
PI362334	31	2016	4	47.1056	38.2704	8.64811	23.46
PI362336	32	2016	4	34.8084	41.4756	11.5653	26.08
PI428557	33	2016	4	38.7701	32.3699	9.13295	26.74
PI483007	34	2016	4	44.1053	39.038	11.0738	27.96
PI483013	35	2016	4	42.1208	42.8429	9.94036	27.82
PI487200	36	2016	4	33.0803	37.7278	12.0043	27.01
PI487282	37	2016	4	37.1245	32.2543	11.2139	28.28
PI542160	38	2016	4	43.7147	41.8122	10.917	25.53
PI542166	39	2016	4	47.4175	34.6578	10.2649	27.47
PI550932	40	2016	4	40.5115	46.696	9.5815	25.77
PI550952	41	2016	4	35.6054	33.8852	10.1545	26.2
PI550965	42	2016	4	28.1409	37.1965	9.8234	24.17
PI550970	43	2016	4	45.0232	45.9336	9.50745	26.03
PI550983	44	2016	4	36.2601	39.4105	9.60699	26.59
PI550997	45	2016	4	46.0368	42.1397	12.1179	26.67
PI551016	46	2016	4	40.2381	43.2886	11.6331	24.77
PI554159	47	2016	4	39.2019	34.7682	8.83002	27.61
PI554171	48	2016	4	32.8414	32.8482	11.4345	19.58
PI554176	49	2016	4	40.6196	43.6227	7.3955	26.25
PI573343	50	2016	4	43.2821	45.8515	12.5546	24.61
PI573356	51	2016	4	41.1647	39.3013	15.6114	28.57
PI614609	52	2016	4	26.7783	46.6208	6.9874	25.53
PI614611	53	2016	4	29.26	40.9692	9.80176	21.5
TA10058	54	2016	4	35.5817	40.6181	11.0375	24.82
TA10059	55	2016	4	30.4095	50.4505	12.5125	28.62
TA1957	56	2016	4	45.5238	43.4434	10.9109	25.48
TA1958	57	2016	4	34.9047	45.0119	10.9264	29.81
TA1959	58	2016	4	33.5304	34.104	9.71098	25.35
TA1960	59	2016	4	43.6747	49.2874	13.4204	30.26
TA1963	60	2016	4	43.5758	41.1765	11.5653	29.77
TA1964	61	2016	4	42.2185	50.2503	15.9159	23.51
TA1972	62	2016	4	35.3469	39.7614	11.0338	26.78
TA2000	63	2016	4	42.4939	33.2948	11.2139	26.81
TA2073	64	2016	4	42.3187	44.4934	12.5551	26.48
TA2074	65	2016	4	53.1821	39.8455	8.16777	27.11
TA2077	66	2016	4	41.1738	39.0139	11.3612	26.01
TA2078	67	2016	4	24.1083	42.4971	9.62199	30.55
TA2079	68	2016	4	45.7781	49.4062	9.14489	27.89
TA2080	69	2016	4	38.3831	37.4751	12.1272	27.93
TA2081	70	2016	4	36.4708	38.8388	10.7107	23.91
TA2082	71	2016	4	38.5742	49.6437	9.61995	25.73
TA2083	72	2016	4	44.2838	39.7092	13.6465	26.66
TA2168	73	2016	4	38.7815	43.7299	14.6838	27.24
TA2169	74	2016	4	37.2277	42.1806	14.6476	27.29
TA2349	75	2016	4	34.229	34.1996	8.52391	26.09
TA2659	76	2016	4	41.78	42.0428	12.2328	27.99
TA2662	77	2016	4	40.4028	38.2159	11.4537	24.64
TA2663	78	2016	4	41.1581	44.7743	9.73872	26.29
TA2664	79	2016	4	36.4437	37.1371	12.012	27.79
TA2782	80	2016	4	22.5772	36.9781	7.85288	29.1
TA2783	81	2016	4	42.0656	39.9329	8.72483	26.75
TA2784	82	2016	4	30.7826	36.0694	9.01734	23.55
TA2785	83	2016	4	33.3107	31.7048	9.04366	24.23
AE116094	1	2017	4	37.6326	44.3907	7.44681	25.31
AE27480	2	2017	4	29.2605	34.3096	10.9833	27.2
AE35478	3	2017	4	33.4769	33.209	13.6194	26.07
AE55078	4	2017	4	30.4449	45.648	8.31721	27.81
AE75182	5	2017	4	30.7917	34.8881	10.4478	25.54
AE75490	6	2017	4	27.6651	41.1992	8.31721	32.97
AE78689	7	2017	4	38.2355	35.541	12.1269	29.85
AE84388	8	2017	4	37.8924	41.4226	10.7741	27.94
AE84484	9	2017	4	36.9908	39.7485	9.96132	28.96
AE98192	10	2017	4	42.4307	47.7756	9.76789	26.77
AE99992	11	2017	4	37.4744	34.7195	7.93037	24.96
MvGB1325	12	2017	4	33.7226	36.7155	8.3682	28.2
MvGB1326	13	2017	4	34.6526	41.0042	8.89121	26.35
MvGB376	14	2017	4	33.6473	38.4913	8.12379	30.97
MvGB377	15	2017	4	37.9499	38.3396	11.1007	28.77
MvGB379	16	2017	4	37.4051	41.9729	7.54352	26.47
MvGB380	17	2017	4	29.3112	33.743	12.9609	28.98
MvGB381	18	2017	4	50.9	45.3	11.11	26.7
MvGB382	19	2017	4	34.755	47.6987	13.8075	27.37
MvGB409	20	2017	4	43.3018	43.6883	9.98902	28.61
MvGB470	21	2017	4	35.7074	46.3354	13.7888	29.73
MvGB600	22	2017	4	36.7352	39.5036	10.3413	26.69
MvGB635	23	2017	4	37.3294	46.5839	10.1863	26.1
MvGB642	24	2017	4	23.4681	34.3096	8.159	27.18
MvGB702	25	2017	4	35.6116	40.6147	11.5258	29.22
PI177241	26	2017	4	31.362	41.0618	8.99242	25.56
PI219797	27	2017	4	36.7004	50.6037	10.7574	28.9
PI276965	28	2017	4	43.5713	38.6592	10.5028	23.29
PI344786	29	2017	4	39.5174	39.4366	11.3759	25.65
PI349036	30	2017	4	30.801	33.1844	11.8436	27.38
PI362334	31	2017	4	42.7963	48.4472	12.4224	26.81
PI362336	32	2017	4	38.2235	50.0621	12.4224	25.52
PI428557	33	2017	4	37.2265	40.7367	9.2091	26.17
PI483007	34	2017	4	37.1499	38.3891	8.89121	28.25
PI483013	35	2017	4	39.6699	42.0889	8.89349	29.26
PI487200	36	2017	4	31.6859	37.5412	12.1844	28.76
PI487282	37	2017	4	33.4855	40.9534	10.4009	29.45
PI542160	38	2017	4	41.52	34.7099	10.0295	26.23
PI542166	39	2017	4	43.6206	37.3648	9.63618	27.68
PI550932	40	2017	4	34.8825	42.905	11.5084	26.09
PI550952	41	2017	4	31.6495	36.0075	8.30224	26.55
PI550965	42	2017	4	28.2797	34.4216	7.74254	25.17
PI550970	43	2017	4	43.595	40.8939	10.0559	26.23
PI550983	44	2017	4	37.355	40.9046	8.45624	25.22
PI550997	45	2017	4	36.8163	41.1996	10.6195	25.99
PI551016	46	2017	4	39.1081	40.1674	11.5063	24.85
PI554159	47	2017	4	30.2207	34.2183	8.16126	25.63
PI554171	48	2017	4	34.6383	37.7778	11.2222	22.81
PI554176	49	2017	4	35.04	43.0296	8.78156	25.3
PI573343	50	2017	4	44.2747	43.8545	10.7178	26.37
PI573356	51	2017	4	39.4531	37.3648	13.3727	27.49
PI614609	52	2017	4	23.8092	36.6197	9.53413	26.02
PI614611	53	2017	4	26.2636	37.4302	8.60335	24.53
TA10058	54	2017	4	33.497	32.8358	9.88806	26.08
TA10059	55	2017	4	30.3387	39.8139	11.9959	32.77
TA1957	56	2017	4	42.1947	37.6422	10.6515	25.51
TA1958	57	2017	4	30.5061	41.9753	9.87654	28.65
TA1959	58	2017	4	29.6928	40.0867	10.9426	27.83
TA1960	59	2017	4	36.4595	45.679	10.7744	29.75
TA1963	60	2017	4	37.2976	48.5714	12.9193	29.21
TA1964	61	2017	4	36.0041	40.4343	15.4187	28.72
TA1972	62	2017	4	32.4985	39.1934	11.3754	26.95
TA2000	63	2017	4	45.3149	42.1452	11.9177	25.9
TA2073	64	2017	4	37.1524	53.4161	13.4161	26.29
TA2074	65	2017	4	51.0376	36.6604	6.90299	26.04
TA2077	66	2017	4	38.2632	40.5049	11.6356	27.34
TA2078	67	2017	4	26.0331	36.8715	11.6201	28.92
TA2079	68	2017	4	41.8361	46.1279	10.8866	27.12
TA2080	69	2017	4	34.1672	36.091	13.4436	28.23
TA2081	70	2017	4	33.4094	43.0296	12.9528	25.61
TA2082	71	2017	4	39.172	46.0157	10.3255	27.08
TA2083	72	2017	4	37.6564	46.3524	13.468	27.64
TA2168	73	2017	4	35.2722	41.7124	15.4533	27.26
TA2169	74	2017	4	33.7913	45.7143	16.3975	26.84
TA2349	75	2017	4	34.2622	33.3333	11	26.47
TA2659	76	2017	4	37.6171	42.8732	10.5499	28.11
TA2662	77	2017	4	37.3115	38.8827	12.6257	27.38
TA2663	78	2017	4	41.023	45.679	10.5499	25.63
TA2664	79	2017	4	36.7943	39.8139	14.8221	28.18
TA2782	80	2017	4	20.0521	42.3602	7.45342	30.76
TA2783	81	2017	4	39.8383	49.1582	8.41751	26.27
TA2784	82	2017	4	33.5485	42.9036	8.99242	25.47
TA2785	83	2017	4	35.334	37.6667	7.55556	28.46
Mv9kr1		2016	1	9.13708	38.6128	9.93789	13.08
		2016	2	9.45956	38.9234	10.4555	12.62
		2016	3	9.53809	42.9607	12.2153	13.22
		2016	4	9.63744	40.1656	10.559	12.71
Mv9kr1		2017	1	8.42157	38.9764	11.0169	12.99
		2017	2	7.95128	41.5519	10.9196	13.05
		2017	3	9.56152	40.6118	10.6344	13.27
		2017	4	8.56122	39.8179	9.9619	12.71
