# Supplementary material for: Identification of New QTLs for Dietary Fiber Content in Aegilops biuncialis
Source: Int J Mol Sci. 2022 Mar 30;23(7):3821. doi: 10.3390/ijms23073821 (PMC8999039; doi:10.3390/ijms23073821)
Supplement: Supplementary file 1 [file ijms-23-03821-s001.zip › Table S2.xlsx]

## Sheet: Metadata
Table S2 for the publication Ivanizs et al. 'Identification of new QTLs for dietary fibre content in an Aegilops biuncialis collection through a GWAS approach'. The results of BLASTn search of SNP-DArT markers associated to grain quality traits β-glucan (BG), protein (Protein), total-pentosan (TP) and water-extractable pentosan (WEP) of Ae. biuncialis against the draft sequence assemblies of M an…

## Sheet: M-U genomes
		Comosa Hit #1						Comosa Hit #2						Umbellata Hit #1						Umbellata Hit #2
QTL	marker id	chromosomal scaffold	aln length	e-value	identity	start		chromosomal scaffold	aln length	e-value	identity	start		chromosomal scaffold	aln length	e-value	identity	start		chromosomal scaffold	aln length	e-value	identity	start
1	1|BG|100022501_F_0	4M_Scaffold198879	69	1.18e-24	97.101	12545		4M_Scaffold203415	68	5.71e-16	88.235	1981		jcf7180008064717_6u	68	6.15e-19	91.176	4603		jcf7180008104427_6u	69	2.01e-12	84.058	6752
2	2|Protein|100013840_F_0	5M_Scaffold201477	74	1.03e-12	83.784	19779		7M_Scaffold9504	25	0.91	92	29101		scf7180012116487_7u	25	0.51	92	22943		scf7180012033623_7u	25	0.51	92	1270
3	3|BG|100079925_F_0	4M_Scaffold88623	69	9.67e-26	98.551	7260		1M_Scaffold124987	69	9.67e-26	98.551	7282		jcf7180008733080_1u	69	6.57e-25	97.101	4640		scf7180012057497_7u	35	2.3e-05	94.286	12375
4	4|WEP|100001630_F_0	6M_Scaffold10404	50	4.69e-17	100	18974		6M_Scaffold2289	50	6.52e-09	88	4937		scf7180015094545_4u	40	8.01e-05	87.5	1162		scf7180014975860_4u	40	8.01e-05	87.5	2790
5	5|WEP|100011893_F_0	2M_Scaffold42355	59	2.59e-20	98.305	6642		2M_Scaffold921	59	2.59e-20	98.305	18800		scf7180031465723_2u	57	9.13e-17	94.737	1286		scf7180031619727_2u	59	9.13e-17	93.22	565
6	6|Protein|100074730_F_0	4M_Scaffold24104	63	2.13e-21	96.825	428		1M_Scaffold158639	63	2.13e-21	96.825	1449		jcf7180008817041_1u	63	9.75e-23	98.413	12210		jcf7180008751223_1u	63	5.05e-20	95.238	1933
7	7|TP|100016211_F_0	2M_Scaffold79463	43	2.96e-13	100	20737		5M_Scaffold49485	43	2.96e-13	100	20698		jcf7180008094914_6u	42	6.58e-06	88.095	10533		scf7180012144861_7u	23	0.51	95.652	365
8	8|TP|100030135_F_0	5M_Scaffold19883	69	9.67e-26	98.551	15377		7M_Scaffold16716	40	0.002	87.5	55659		scf7180012121828_7u	63	5.05e-20	95.238	8224		jcf7180008785394_1u	63	5.05e-20	95.238	8359
9	9|Protein|100054424_F_0	2M_Scaffold51020	55	9.06e-20	100	1967		3M_Scaffold66340	26	0.000501	100	15922		scf7180031539216_2u	55	5.05e-20	100	692		scf7180031631775_2u	48	2.3e-05	83.333	1744
10	10|Protein|100033763_F_0	4M_Scaffold228327	55	3.85e-18	98.182	2981		3M_Scaffold6611	53	1.53e-10	88.679	24744		jcf7180008001545_6u	55	2.62e-17	96.364	16267		scf7180031464291_2u	53	1.88e-06	83.019	9144
11	11|Protein|100016524_F_0	7M_Scaffold18269	51	5.71e-16	98.039	49786								scf7180012145904_7u	51	3.88e-15	96.078	6969		scf7180011406378_3u	23	6.2	95.652	1234
12	12|WEP|100024379_F_0	3M_Scaffold28640	39	0.000501	87.179	10997		5M_Scaffold77234	42	0.074	80.952	445		scf7180011490517_3u	39	2.45e-11	100	8764		scf7180016182094_5u	28	0.51	89.286	1526
13	13|Protein|100013808_F_0	5M_Scaffold303304	68	1.75e-22	95.588	6866		3M_Scaffold16848	36	3.2	83.333	3481		scf7180016153074_5u	69	5.39e-26	98.551	745		scf7180012066598_7u	25	0.51	92	148
14	14|WEP|100009067_F_0	1M_Scaffold41677	57	7.43e-21	100	14682		4M_Scaffold7512	57	3.16e-19	98.246	1550		jcf7180008786162_1u	57	4.15e-21	100	13314		jcf7180008096523_6u	56	1.04e-09	85.714	2135
15	15|WEP|100027188_F_0	7M_Scaffold13873	64	1.18e-24	100	10643		3M_Scaffold16385	64	6.1e-22	96.875	7406		scf7180012053068_7u	64	3.4e-22	96.875	5301		scf7180011431513_3u	62	1.76e-19	95.161	2268
16	16|WEP|100015451_F_0	4M_Scaffold9987	56	2.59e-20	100	1669		1M_Scaffold15613	56	2.59e-20	100	28317		jcf7180008729407_1u	35	1.88e-06	94.286	784		scf7180012061168_7u	35	0.012	88.571	1696
17	17|WEP|100013669_F_0	3M_Scaffold29553	69	2.27e-27	100	27943		6M_Scaffold4185	19	3.2	100	10224		scf7180011457053_3u	69	1.45e-20	92.754	11481		jcf7180008801547_1u	18	6.2	100	2597
18	18|WEP|100033114_F_0	7M_Scaffold6134	49	1.64e-16	100	2220		6M_Scaffold47998	49	4.11e-05	83.673	2251		scf7180012066458_7u	49	3.88e-15	97.959	1533		scf7180014907182_4u	49	2.3e-05	83.673	7485
19	19|WEP|100006546_F_0	6M_Scaffold24442	35	0.074	85.714	19713		6M_Scaffold43323	24	0.26	95.833	6464		jcf7180008100236_6u	69	1.27e-27	100	6254		jcf7180008768406_1u	30	0.041	90	5050
20	20|WEP|100030958_F_0	6M_Scaffold10123	42	4.39e-11	97.619	2600		7M_Scaffold53592	22	3.2	95.455	12293		scf7180015102729_4u	32	0.51	87.5	10725		scf7180012031168_7u	22	1.8	95.455	135
21	21|WEP|100041833_F_0
22	22|WEP|100001948_F_0	3M_Scaffold32003	47	8.48e-14	97.872	5012		3M_Scaffold23992	45	3.38e-06	86.667	5360		scf7180011394611_3u	48	1.65e-13	95.833	4071		scf7180011378099_3u	45	3.64e-09	91.111	3751
23	23|WEP|100010676_F_0	4M_Scaffold120148	69	6.1e-22	94.203	863		1M_Scaffold2391	69	6.1e-22	94.203	5068		scf7180014996365_4u	69	1.27e-08	78.261	3920		scf7180016153066_5u	21	6.2	95.238	13819
24	24|WEP|100001383_F_0	3M_Scaffold59472	53	4.69e-17	98.113	2600		7M_Scaffold23497	53	0.002	79.245	1478		scf7180011434020_3u	53	2.62e-17	98.113	5429		scf7180012079846_7u	52	0.003	78.846	6388
25	25|WEP|100070301_F_0	2M_Scaffold19358	55	9.06e-20	100	3271		6M_Scaffold1743	35	0.91	85.714	19166		scf7180031567607_2u	55	2.15e-18	98.182	7325		jcf7180008725388_1u	23	0.51	95.652	17287
26	26|WEP|100036161_F_0	3M_Scaffold32949	42	1.03e-12	100	21534		5M_Scaffold353099	29	0.000501	96.552	655		scf7180011445675_3u	42	2.45e-11	97.619	4693		scf7180031647114_2u	30	0.041	90	622
27	27|WEP|100009019_F_0	6M_Scaffold38253	57	3.16e-19	98.246	9555		6M_Scaffold14910	57	1.64e-16	94.737	9538		scf7180015089217_4u	57	2.15e-18	96.491	1719		scf7180012133903_7u	32	8.01e-05	93.75	1960
28	28|WEP|100024849_F_0	6M_Scaffold56411	69	9.67e-26	98.551	2532		7M_Scaffold31765	65	3.85e-18	92.308	7027		jcf7180008034826_6u	69	5.39e-26	98.551	5166		scf7180015055354_4u	65	1.36e-14	87.692	11154
29	29|WEP|100010471_F_0	6M_Scaffold2438	69	9.67e-26	98.551	15249								scf7180015102271_4u	58	6.15e-19	96.552	174		scf7180015056609_4u	22	0.041	100	6478
30	30|WEP|100005191_F_0	4M_Scaffold47423	62	1.44e-23	100	14429		4M_Scaffold265062	62	3.85e-18	93.548	3305		jcf7180008696990_1u	62	8e-24	100	9521		jcf7180008100921_6u	36	0.00028	88.889	23881
31	31|WEP|100006760_F_0	3M_Scaffold24618	57	1.99e-15	94.737	34974		1M_Scaffold47833	45	3.38e-06	86.667	13349		scf7180011410936_3u	37	0.001	89.189	641		jcf7180008039141_6u	32	0.003	90.625	560
32	32|WEP|100014148_F_0	3M_Scaffold9366	75	6.96e-15	84	5122		7M_Scaffold47208	29	3.2	86.207	2218		scf7180011364862_3u	69	1.27e-27	100	6565		scf7180012127718_7u	18	6.2	100	2538
33	33|WEP|100066878_F_0	4M_Scaffold167212	69	3.16e-19	91.304	8857		4M_Scaffold16519	69	3.16e-19	91.304	2429		jcf7180007998644_6u	69	5.39e-26	98.551	1895		scf7180031588138_2u	21	6.2	95.238	881
34	34|WEP|100069132_F_0	4M_Scaffold19066	69	2.27e-27	100	89		1M_Scaffold37374	69	2.27e-27	100	7380		jcf7180008113154_6u	69	1.27e-27	100	24		scf7180012126988_7u	26	1.8	92.308	18614

## Sheet: A genome
		Wheat Genome "A" Hit #1									Wheat Genome "A" Hit #2
QTL	marker id	chr	aln length	e-value	identity	start	gene	go	pfam		chr	aln length	e-value	identity	start	gene	go	pfam
1	1|BG|100022501_F_0	4A	69	1.42e-24	97.101	581279657	TraesCS4A02G269600	[CC] integral component of membrane [GO:0016021]	MAPEG family [PF01124.18]		7A	23	1.1	95.652	704588400
2	2|Protein|100013840_F_0	5A	69	1.17e-25	98.551	649401879					7A	25	1.1	92	165799568
3	3|BG|100079925_F_0	1A	69	1.17e-25	98.551	355630234	TraesCS1A02G197700	[CC] integral component of membrane [GO:0016021]; [MF] transmembrane transporter activity [GO:0022857]	Major Facilitator Superfamily [CL0015]; POT family [PF00854.21]		7A	35	4.98e-05	94.286	78453240	TraesCS7A02G121600	[CC] integral component of membrane [GO:0016021]; [MF] transmembrane transporter activity [GO:0022857]	Major Facilitator Superfamily [CL0015]; Major Facilitator Superfamily [PF07690.16]; Penicillin-binding protein N-terminus [PF17093.5]; POT family [PF00854.21]
4	4|WEP|100001630_F_0	6A	50	7.88e-09	88	606364712					1A	25	0.09	96	300672980	TraesCS1A02G167900		Double Psi beta barrel glucanase [CL0199]; Barwin family [PF00967.17]; Lytic transglycolase [PF03330.18]; Herpesvirus latent membrane protein 1 (LMP1) [PF05297.11]
5	5|WEP|100011893_F_0	2A	58	1.09e-19	98.276	742781083	TraesCS2A02G519900	[MF] metal ion binding [GO:0046872]; [MF] oxidoreductase activity [GO:0016491]	Cupin fold [CL0029]; 2OG-Fe(II) oxygenase superfamily [PF03171.20]; non-haem dioxygenase in morphine synthesis N-terminal [PF14226.6]		3A	47	0.000174	82.979	526864128	TraesCS3A02G294000	[BP] gibberellin catabolic process [GO:0045487]; [MF] C-19 gibberellin 2-beta-dioxygenase activity [GO:0052634]; [MF] dioxygenase activity [GO:0051213]; [MF] metal ion binding [GO:0046872]	Cupin fold [CL0029]; 2OG-Fe(II) oxygenase superfamily [PF03171.20]; non-haem dioxygenase in morphine synthesis N-terminal [PF14226.6]
6	6|Protein|100074730_F_0	1A	63	2.11e-22	98.413	64852033					7A	63	7.88e-09	82.54	670554552	TraesCS7A02G475500	[CC] integral component of membrane [GO:0016021]	Type-F conjugative transfer system pilin chaperone (TraQ) [PF09679.10]
7	7|TP|100016211_F_0	2A	43	3.58e-13	100	757936128	TraesCS2A02G550739		Endosomal sorting complex assembly domain [CL0596]; Tetratrico peptide repeat superfamily [CL0020]; PPR repeat [PF01535.20]; PPR repeat [PF12854.7]; PPR repeat family [PF13041.6]; Pentatricopeptide repeat domain [PF13812.6]; Pentacotripeptide-repeat region of PRORP [PF17177.4]; Tetratricopeptide repeat [PF13428.6]; Tetratricopeptide repeat [PF14559.6]; Tetratricopeptide repeat [PF14561.6]; Vps23 …		5A	26	0.31	92.308	63939262
8	8|TP|100030135_F_0	5A	69	1.42e-24	97.101	477397435	TraesCS5A02G265600	[BP] transcription, DNA-templated [GO:0006351]; [MF] DNA-binding transcription factor activity [GO:0003700]; [MF] sequence-specific DNA binding [GO:0043565]	bZIP-like leucine zipper [CL0018]; bZIP transcription factor [PF00170.21]; Basic region leucine zipper [PF07716.15]; Seed dormancy control [PF14144.6]		2A	63	1.33e-18	93.651	500245112
9	9|Protein|100054424_F_0	2A	55	4.66e-18	98.182	723512528					3A	26	0.026	96.154	655573713
10	10|Protein|100033763_F_0	2A	55	4.66e-18	98.182	39684856					3A	55	3.35e-07	83.636	57221318
11	11|Protein|100016524_F_0	7A	51	6.91e-16	98.039	571935946	TraesCS7A02G393700		Tetratrico peptide repeat superfamily [CL0020]; PPR repeat [PF01535.20]; PPR repeat [PF12854.7]; PPR repeat family [PF13041.6]; Pentatricopeptide repeat domain [PF13812.6]; Pentacotripeptide-repeat region of PRORP [PF17177.4]		3A	26	3.8	92.308	271842648
12	12|WEP|100024379_F_0	3A	39	0.000606	87.179	616492228	TraesCS3A02G367600	[CC] nucleus [GO:0005634]; [MF] DNA binding [GO:0003677]	Helix-turn-helix clan [CL0123]; Myb-like DNA-binding domain [PF13921.6]; Myb DNA-binding like [PF15963.5]; Myb-like DNA-binding domain [PF00249.31]; SLIDE [PF09111.10]; TEA/ATTS domain [PF01285.18]		7A	37	0.09	86.486	721227560
13	13|Protein|100013808_F_0	5A	69	7.38e-22	94.203	571467677	TraesCS5A02G373500	[MF] DNA-binding transcription factor activity [GO:0003700]	CCAAT-binding transcription factor (CBF-B/NF-YA) subunit B [PF02045.15]		6A	25	1.1	92	328566166
14	14|WEP|100009067_F_0	1A	57	3.82e-19	98.246	448034693	TraesCS1A02G255800	[BP] terpenoid biosynthetic process [GO:0016114]; [MF] 1-deoxy-D-xylulose-5-phosphate synthase activity [GO:0008661]	Thiamin diphosphate-binding superfamily [CL0254]; Transketolase C-terminal domain-like superfamily [CL0591]; 1-deoxy-D-xylulose-5-phosphate synthase [PF13292.6]; Dehydrogenase E1 component [PF00676.20]; Thiamine pyrophosphate enzyme, C-terminal TPP binding domain [PF02775.21]; Transketolase, pyrimidine binding domain [PF02779.24]; Transketolase, C-terminal domain [PF02780.20]; Transketolase, thia…		2A	56	9.6e-08	83.929	765017879	TraesCS2A02G565400	[BP] terpenoid biosynthetic process [GO:0016114]; [MF] 1-deoxy-D-xylulose-5-phosphate synthase activity [GO:0008661]	Thiamin diphosphate-binding superfamily [CL0254]; Transketolase C-terminal domain-like superfamily [CL0591]; 1-deoxy-D-xylulose-5-phosphate synthase [PF13292.6]; Dehydrogenase E1 component [PF00676.20]; Thiamine pyrophosphate enzyme, C-terminal TPP binding domain [PF02775.21]; Transketolase, pyrimidine binding domain [PF02779.24]; Transketolase, C-terminal domain [PF02780.20]; Transketolase, thia…
15	15|WEP|100027188_F_0	7A	64	7.38e-22	96.875	292818944	TraesCS7A02G277900		Plant protein of unknown function (DUF868) [PF05910.12]		5A	22	3.8	95.455	59886712
16	16|WEP|100015451_F_0	1A	54	0.000174	79.63	491131508					7A	24	0.31	95.833	701721539
17	17|WEP|100013669_F_0	3A	69	1.62e-17	89.855	495499383					6A	19	3.8	100	549534939	TraesCS6A02G312900	[MF] ATP binding [GO:0005524]; [MF] RNA binding [GO:0003723]; [MF] RNA helicase activity [GO:0003724]	Alpha/Beta hydrolase fold [CL0028]; P-loop containing nucleoside triphosphate hydrolase superfamily [CL0023]; AAA domain [PF13401.6]; Alpha/beta hydrolase family [PF12695.7]; DEAD/DEAH box helicase [PF00270.29]; Domain of unknown function (DUF4217) [PF13959.6]; Helicase conserved C-terminal domain [PF00271.31]; Nup93/Nic96 [PF04097.14]; PhoH-like protein [PF02562.16]; Type III restriction enzyme,…
18	18|WEP|100033114_F_0	7A	49	8.42e-15	97.959	140536697					6A	49	4.98e-05	83.673	540145640	TraesCS6A02G306500	[MF] DNA-binding transcription factor activity [GO:0003700]	Dimeric alpha/beta barrel superfamily [CL0032]; Transcriptional activator LAG-3 [PF11498.8]; Protein of unknown function (DUF2722) [PF10846.8]; Mediator complex subunit 3 fungal [PF11593.8]; L-rhamnose mutarotase [PF05336.13]; TCP family transcription factor [PF03634.13]; Transcription factor IIA, alpha/beta subunit [PF03153.13]
19	19|WEP|100006546_F_0	6A	69	3.82e-19	91.304	103291960					5A	24	0.31	95.833	411945829
20	20|WEP|100030958_F_0	6A	42	6.47e-10	95.238	435760675	TraesCS6A02G231000	[BP] protein glycosylation [GO:0006486]; [CC] integral component of membrane [GO:0016021]; [MF] transferase activity, transferring glycosyl groups [GO:0016757]	Exostosin family [PF03016.15]		7A	32	1.1	87.5	259351141
21	21|WEP|100041833_F_0
22	22|WEP|100001948_F_0	3A	47	1.25e-12	95.745	555693914	TraesCS3A02G314700				5A	24	3.8	91.667	667202396
23	23|WEP|100010676_F_0	6A	72	2.57e-21	93.056	616250737	TraesCS6A02G418300	[BP] response to abscisic acid [GO:0009737]	Glycoside hydrolase/deacetylase superfamily [CL0158]; Uncharacterized protein conserved in bacteria (DUF2334) [PF10096.9]		1A	57	1.98e-16	94.737	313489494	TraesCS1A02G175500	[BP] response to abscisic acid [GO:0009737]	Frizzled cysteine-rich domain-related superfamily [CL0644]; Glypican [PF01153.19]
24	24|WEP|100001383_F_0	3A	53	2.94e-14	94.34	120802142	TraesCS3A02G141500		SGNH hydrolase superfamily [CL0264]; Domain of unknown function (DUF4148) [PF13663.6]; GDSL/SGNH-like Acyl-Esterase family found in Pmr5 and Cas1p [PF13839.6]; PMR5 N terminal Domain [PF14416.6]		7A	52	0.09	76.923	511794706	TraesCS7A02G349000		SGNH hydrolase superfamily [CL0264]; GDSL/SGNH-like Acyl-Esterase family found in Pmr5 and Cas1p [PF13839.6]; PMR5 N terminal Domain [PF14416.6]
25	25|WEP|100070301_F_0	2A	55	1.09e-19	100	176077246	TraesCS2A02G201900	[MF] protein serine/threonine phosphatase activity [GO:0004722]	PP2C-like superfamily [CL0238]; Protein phosphatase 2C [PF00481.21]		7A	50	0.31	78	381490932
26	26|WEP|100036161_F_0	3A	42	2.75e-08	92.857	492037304	TraesCS3A02G267100		Protein of unknown function (DUF1639) [PF07797.14]		4A	37	0.026	89.189	148110893
27	27|WEP|100009019_F_0	6A	57	1.98e-16	94.737	580204752	TraesCS6A02G347900	[CC] integral component of membrane [GO:0016021]; [MF] ligand-gated ion channel activity [GO:0015276]	Ion channel (VIC) superfamily [CL0030]; Periplasmic binding protein clan [CL0177]; Periplasmic binding protein like [CL0144]; Receptor family ligand binding region [PF01094.28]; Ligand-gated ion channel [PF00060.26]; Ligated ion channel L-glutamate- and glycine-binding site [PF10613.9]; Periplasmic binding protein domain [PF13433.6]; Periplasmic binding protein [PF13458.6]; Bacterial extracellula…		7A	57	3.35e-07	82.456	107090974
28	28|WEP|100024849_F_0	6A	69	1.17e-25	98.551	94227271	TraesCS6A02G122100	[BP] cellulose catabolic process [GO:0030245]; [MF] cellulase activity [GO:0008810]	Six-hairpin glycosidase superfamily [CL0059]; Glycosyl hydrolase family 9 [PF00759.19]		7A	65	4.66e-18	92.308	158395420	TraesCS7A02G197900	[BP] cellulose catabolic process [GO:0030245]; [MF] cellulase activity [GO:0008810]	Six-hairpin glycosidase superfamily [CL0059]; Glycosyl hydrolase family 9 [PF00759.19]
29	29|WEP|100010471_F_0	6A	69	3.14e-20	92.754	437024690					2A	28	1.1	89.286	28994924
30	30|WEP|100005191_F_0	5A	62	3.82e-19	95.161	677484930	TraesCS5A02G513700	[MF] metal ion binding [GO:0046872]; [MF] oxidoreductase activity [GO:0016491]	Cupin fold [CL0029]; 2OG-Fe(II) oxygenase superfamily [PF03171.20]; non-haem dioxygenase in morphine synthesis N-terminal [PF14226.6]		6A	62	0.000174	77.419	563540411	TraesCS6A02G331400	[MF] metal ion binding [GO:0046872]; [MF] oxidoreductase activity [GO:0016491]	Cupin fold [CL0029]; 2OG-Fe(II) oxygenase superfamily [PF03171.20]; non-haem dioxygenase in morphine synthesis N-terminal [PF14226.6]
31	31|WEP|100006760_F_0	3A	57	1.25e-12	91.228	509427950	TraesCS3A02G280200	[CC] integral component of membrane [GO:0016021]; [MF] calcium ion binding [GO:0005509]; [MF] oxidoreductase activity, acting on NAD(P)H, oxygen as acceptor [GO:0050664]; [MF] peroxidase activity [GO:0004601]	EF-hand like superfamily [CL0220]; Ferredoxin / Ferric reductase-like NAD binding [CL0091]; Riboflavin synthase/Ferredoxin reductase FAD binding domain [CL0076]; Transmembrane di-heme cytochrome superfamily [CL0328]; EF hand [PF00036.32]; EF hand [PF13202.6]; EF-hand domain [PF13405.6]; EF-hand domain pair [PF13499.6]; FAD-binding domain [PF08022.12]; Ferric reductase like transmembrane component…		1A	45	4.08e-06	86.667	533455672	TraesCS1A02G347700	[CC] integral component of membrane [GO:0016021]; [MF] calcium ion binding [GO:0005509]; [MF] oxidoreductase activity, acting on NAD(P)H, oxygen as acceptor [GO:0050664]; [MF] peroxidase activity [GO:0004601]	EF-hand like superfamily [CL0220]; Ferredoxin / Ferric reductase-like NAD binding [CL0091]; Riboflavin synthase/Ferredoxin reductase FAD binding domain [CL0076]; Transmembrane di-heme cytochrome superfamily [CL0328]; EF hand [PF00036.32]; EF hand [PF13202.6]; EF-hand domain [PF13405.6]; EF-hand domain pair [PF13499.6]; FAD-binding domain [PF08022.12]; Ferric reductase like transmembrane component…
32	32|WEP|100014148_F_0	3A	68	4.97e-24	97.059	109871105	TraesCS3A02G132800		Protein of unknown function (DUF616) [PF04765.13]		4A	27	3.8	88.889	492338855
33	33|WEP|100066878_F_0	4A	39	0.31	82.051	598805899
34	34|WEP|100069132_F_0	1A	69	1.42e-24	97.101	584676953					7A	42	3.8	78.571	302031056	TraesCS7A02G280900	[MF] metal ion binding [GO:0046872]; [MF] oxidoreductase activity [GO:0016491]	Cupin fold [CL0029]; 2OG-Fe(II) oxygenase superfamily [PF03171.20]; non-haem dioxygenase in morphine synthesis N-terminal [PF14226.6]

## Sheet: B genome
		Wheat Genome "B" Hit #1									Wheat Genome "B" Hit #2
QTL	marker id	chr	aln length	e-value	identity	start	gene	go	pfam		chr	aln length	e-value	identity	start	gene	go	pfam
1	1|BG|100022501_F_0	4B	69	1.23e-25	98.551	32250885	TraesCS4B02G044500	[CC] integral component of membrane [GO:0016021]	MAPEG family [PF01124.18]		7B	25	1.2	92	627589520
2	2|Protein|100013840_F_0	5B	70	5.58e-11	84.286	656805047					7B	25	1.2	92	126538872	TraesCS7B02G110600	[MF] ATP binding [GO:0005524]; [MF] histone binding [GO:0042393]	P-loop containing nucleoside triphosphate hydrolase superfamily [CL0023]; DEAD/DEAH box helicase [PF00270.29]; DEAD_2 [PF06733.15]; Helicase conserved C-terminal domain [PF00271.31]; Type III restriction enzyme, res subunit [PF04851.15]; Snf2-ATP coupling, chromatin remodelling complex [PF14619.6]; SNF2 family N-terminal domain [PF00176.23]
3	3|BG|100079925_F_0	1B	69	1.23e-25	98.551	385658121	TraesCS1B02G212400	[CC] integral component of membrane [GO:0016021]; [MF] transmembrane transporter activity [GO:0022857]	Major Facilitator Superfamily [CL0015]; POT family [PF00854.21]		7B	35	5.22e-05	94.286	18102561	TraesCS7B02G020500	[CC] integral component of membrane [GO:0016021]; [MF] transmembrane transporter activity [GO:0022857]	Major Facilitator Superfamily [CL0015]; Major Facilitator Superfamily [PF07690.16]; POT family [PF00854.21]
4	4|WEP|100001630_F_0	6B	50	5.95e-17	100	701059712					7B	39	0.000636	87.179	662961263
5	5|WEP|100011893_F_0	2B	59	7.74e-22	100	744411882	TraesCS2B02G548600	[MF] metal ion binding [GO:0046872]; [MF] oxidoreductase activity [GO:0016491]	Cupin fold [CL0029]; 2OG-Fe(II) oxygenase superfamily [PF03171.20]; non-haem dioxygenase in morphine synthesis N-terminal [PF14226.6]		3B	50	3.52e-07	86	58860024
6	6|Protein|100074730_F_0	1B	63	5.22e-24	100	107130947	TraesCS1B02G099500	[CC] integral component of membrane [GO:0016021]			7B	63	1.95e-10	84.127	641604396	TraesCS7B02G376700	[CC] integral component of membrane [GO:0016021]	Myc target protein 1 [PF15179.6]; Phosphoprotein associated with glycosphingolipid-enriched [PF15347.6]; SCIMP protein [PF15050.6]; Tumor necrosis factor receptor member 16 trans-membrane domain [PF18422.1]
7	7|TP|100016211_F_0	2B	43	1.6e-11	97.674	769051420	TraesCS2B02G581500		Endosomal sorting complex assembly domain [CL0596]; Tetratrico peptide repeat superfamily [CL0020]; PPR repeat [PF01535.20]; PPR repeat [PF12854.7]; PPR repeat family [PF13041.6]; Pentatricopeptide repeat domain [PF13812.6]; Pentacotripeptide-repeat region of PRORP [PF17177.4]; Tetratricopeptide repeat [PF13428.6]; Tetratricopeptide repeat [PF14559.6]; Tetratricopeptide repeat [PF14561.6]; Vps23 …		6B	28	0.33	92.857	261005387
8	8|TP|100030135_F_0	5B	69	1.5e-24	97.101	449617881	TraesCS5B02G265300	[BP] transcription, DNA-templated [GO:0006351]; [MF] DNA-binding transcription factor activity [GO:0003700]; [MF] sequence-specific DNA binding [GO:0043565]	PAS domain clan [CL0183]; bZIP-like leucine zipper [CL0018]; bZIP transcription factor [PF00170.21]; Basic region leucine zipper [PF07716.15]; Seed dormancy control [PF14144.6]; PAS fold [PF08448.10]		4B	62	4.01e-19	95.161	667298826
9	9|Protein|100054424_F_0	2B	55	2.53e-15	94.545	712360940					3B	26	0.027	96.154	684639487	TraesCS3B02G444700		F-box associated [CL0162]; F-box-like domain [CL0271]; Leucine Rich Repeat [CL0022]; F-box associated domain [PF08268.12]; F-box domain [PF00646.33]; F-box-like [PF12937.7]; Leucine Rich Repeat [PF07723.13]
10	10|Protein|100033763_F_0	6B	53	3.08e-14	94.34	79884610					7B	55	3.08e-14	92.727	735664232
11	11|Protein|100016524_F_0	7B	51	7.25e-16	98.039	532288407	TraesCS7B02G295700		Tetratrico peptide repeat superfamily [CL0020]; PPR repeat [PF01535.20]; PPR repeat [PF12854.7]; PPR repeat family [PF13041.6]; Pentatricopeptide repeat domain [PF13812.6]; Pentacotripeptide-repeat region of PRORP [PF17177.4]		6B	44	1.2	81.818	299369207
12	12|WEP|100024379_F_0	3B	39	5.58e-11	100	630401085	TraesCS3B02G399300	[CC] nucleus [GO:0005634]; [MF] DNA binding [GO:0003677]	Helix-turn-helix clan [CL0123]; Myb-like DNA-binding domain [PF13921.6]; Myb DNA-binding like [PF15963.5]; Myb-like DNA-binding domain [PF00249.31]; SLIDE [PF09111.10]; TEA/ATTS domain [PF01285.18]		4B	43	0.33	81.395	202942911
13	13|Protein|100013808_F_0	5B	68	7.25e-16	89.706	552924062	TraesCS5B02G375500	[MF] DNA-binding transcription factor activity [GO:0003700]	CCAAT-binding transcription factor (CBF-B/NF-YA) subunit B [PF02045.15]; Family of unknown function (DUF5547) [PF17701.1]		6B	25	1.2	92	325022266
14	14|WEP|100009067_F_0	1B	57	4.01e-19	98.246	468510858	TraesCS1B02G266500	[BP] terpenoid biosynthetic process [GO:0016114]; [MF] 1-deoxy-D-xylulose-5-phosphate synthase activity [GO:0008661]	Thiamin diphosphate-binding superfamily [CL0254]; Transketolase C-terminal domain-like superfamily [CL0591]; 1-deoxy-D-xylulose-5-phosphate synthase [PF13292.6]; Dehydrogenase E1 component [PF00676.20]; Thiamine pyrophosphate enzyme, C-terminal TPP binding domain [PF02775.21]; Transketolase, pyrimidine binding domain [PF02779.24]; Transketolase, C-terminal domain [PF02780.20]; Transketolase, thia…		2B	56	0.000636	78.571	798630397	TraesCS2B02G626400	[BP] terpenoid biosynthetic process [GO:0016114]; [MF] 1-deoxy-D-xylulose-5-phosphate synthase activity [GO:0008661]	Thiamin diphosphate-binding superfamily [CL0254]; Transketolase C-terminal domain-like superfamily [CL0591]; 1-deoxy-D-xylulose-5-phosphate synthase [PF13292.6]; Dehydrogenase E1 component [PF00676.20]; Thiamine pyrophosphate enzyme, C-terminal TPP binding domain [PF02775.21]; Transketolase, pyrimidine binding domain [PF02779.24]; Transketolase, C-terminal domain [PF02780.20]; Transketolase, thia…
15	15|WEP|100027188_F_0	7B	64	6.36e-23	98.438	247264550	TraesCS7B02G175700		Plant protein of unknown function (DUF868) [PF05910.12]		2B	24	4	91.667	695294363
16	16|WEP|100015451_F_0	1B	56	4.58e-12	89.286	527649709					4B	27	0.094	92.593	153755126
17	17|WEP|100013669_F_0	3B	69	6.36e-23	95.652	487538435	TraesCS3B02G303400	[CC] integral component of membrane [GO:0016021]	Family A G protein-coupled receptor-like superfamily [CL0192]; Lung seven transmembrane receptor [PF06814.13]		6B	19	4	100	603909308	TraesCS6B02G342900	[MF] ATP binding [GO:0005524]; [MF] RNA binding [GO:0003723]; [MF] RNA helicase activity [GO:0003724]	Alpha/Beta hydrolase fold [CL0028]; P-loop containing nucleoside triphosphate hydrolase superfamily [CL0023]; AAA domain [PF13401.6]; Alpha/beta hydrolase family [PF12695.7]; DEAD/DEAH box helicase [PF00270.29]; Domain of unknown function (DUF4217) [PF13959.6]; Helicase conserved C-terminal domain [PF00271.31]; Nup93/Nic96 [PF04097.14]; PhoH-like protein [PF02562.16]; Type III restriction enzyme,…
18	18|WEP|100033114_F_0	7B	49	2.08e-16	100	105323320	TraesCS7B02G091900	[MF] DNA-binding transcription factor activity [GO:0003700]	3-deoxy-D-manno-oct-2-ulosonic acid (Kdo) hydroxylase [PF11004.8]; Spt20 family [PF12090.8]; TCP family transcription factor [PF03634.13]		6B	49	0.002	81.633	589129224	TraesCS6B02G334900	[MF] DNA-binding transcription factor activity [GO:0003700]	Dimeric alpha/beta barrel superfamily [CL0032]; Ubiquitin superfamily [CL0072]; Domain of unknown function (DUF4430) [PF14478.6]; Mediator complex subunit 3 fungal [PF11593.8]; L-rhamnose mutarotase [PF05336.13]; TCP family transcription factor [PF03634.13]; Transcription factor IIA, alpha/beta subunit [PF03153.13]
19	19|WEP|100006546_F_0	6B	24	0.33	95.833	162605990					5B	26	0.33	92.308	655021348
20	20|WEP|100030958_F_0	6B	40	8.28e-09	95	449774410					7B	32	1.2	87.5	167893137
21	21|WEP|100041833_F_0
22	22|WEP|100001948_F_0	3B	47	1.31e-12	95.745	150855093	TraesCS3B02G157100				5B	27	4	88.889	537977513
23	23|WEP|100010676_F_0	1B	69	3.29e-20	92.754	368710630	TraesCS1B02G204900	[BP] response to abscisic acid [GO:0009737]			7B	24	4	91.667	37557173
24	24|WEP|100001383_F_0	3B	53	5.95e-17	98.113	160796876	TraesCS3B02G163100	[CC] Golgi apparatus [GO:0005794]; [MF] O-acetyltransferase activity [GO:0016413]	SGNH hydrolase superfamily [CL0264]; GDSL/SGNH-like Acyl-Esterase family found in Pmr5 and Cas1p [PF13839.6]; PMR5 N terminal Domain [PF14416.6]		7B	53	0.002	79.245	437424121	TraesCS7B02G233700		SGNH hydrolase superfamily [CL0264]; GDSL/SGNH-like Acyl-Esterase family found in Pmr5 and Cas1p [PF13839.6]; PMR5 N terminal Domain [PF14416.6]
25	25|WEP|100070301_F_0	2B	55	4.89e-18	98.182	223730353	TraesCS2B02G229000	[MF] protein serine/threonine phosphatase activity [GO:0004722]	PP2C-like superfamily [CL0238]; Protein phosphatase 2C [PF00481.21]		6B	26	0.33	92.308	84694413
26	26|WEP|100036161_F_0	3B	42	1.5e-05	88.095	482254288	TraesCS3B02G300600		Protein of unknown function (DUF1639) [PF07797.14]		2B	28	1.2	89.286	700635419
27	27|WEP|100009019_F_0	6B	57	4.89e-18	96.491	656282474	TraesCS6B02G381400	[CC] integral component of membrane [GO:0016021]; [MF] ligand-gated ion channel activity [GO:0015276]	Ion channel (VIC) superfamily [CL0030]; Periplasmic binding protein clan [CL0177]; Periplasmic binding protein like [CL0144]; Receptor family ligand binding region [PF01094.28]; Ligand-gated ion channel [PF00060.26]; Ligated ion channel L-glutamate- and glycine-binding site [PF10613.9]; Periplasmic binding protein domain [PF13433.6]; Periplasmic binding protein [PF13458.6]; Bacterial extracellula…		2B	57	2.89e-08	84.211	680804853
28	28|WEP|100024849_F_0	6B	67	1.5e-24	98.507	151372813	TraesCS6B02G150300	[BP] cellulose catabolic process [GO:0030245]; [MF] cellulase activity [GO:0008810]	Six-hairpin glycosidase superfamily [CL0059]; Glycosyl hydrolase family 9 [PF00759.19]		7B	65	4.89e-18	92.308	120587142	TraesCS7B02G104600	[BP] cellulose catabolic process [GO:0030245]; [MF] cellulase activity [GO:0008810]	Six-hairpin glycosidase superfamily [CL0059]; Glycosyl hydrolase family 9 [PF00759.19]
29	29|WEP|100010471_F_0	6B	69	7.74e-22	94.203	448664544
30	30|WEP|100005191_F_0	4B	62	1.82e-23	100	638174989	TraesCS4B02G344900	[MF] metal ion binding [GO:0046872]; [MF] oxidoreductase activity [GO:0016491]	Cupin fold [CL0029]; 2OG-Fe(II) oxygenase superfamily [PF03171.20]; non-haem dioxygenase in morphine synthesis N-terminal [PF14226.6]; Subtilisin inhibitor-like [PF00720.17]		6B	62	0.002	75.806	633859647	TraesCS6B02G362100	[MF] metal ion binding [GO:0046872]; [MF] oxidoreductase activity [GO:0016491]	Cupin fold [CL0029]; 2OG-Fe(II) oxygenase superfamily [PF03171.20]; non-haem dioxygenase in morphine synthesis N-terminal [PF14226.6]
31	31|WEP|100006760_F_0	3B	45	8.28e-09	91.111	504986571	TraesCS3B02G314000	[BP] oxidation-reduction process [GO:0055114]; [CC] integral component of membrane [GO:0016021]; [CC] plasma membrane [GO:0005886]; [MF] calcium ion binding [GO:0005509]; [MF] NAD(P)H oxidase activity [GO:0016174]; [MF] peroxidase activity [GO:0004601]	EF-hand like superfamily [CL0220]; Ferredoxin / Ferric reductase-like NAD binding [CL0091]; Riboflavin synthase/Ferredoxin reductase FAD binding domain [CL0076]; Transmembrane di-heme cytochrome superfamily [CL0328]; EF hand [PF00036.32]; EF hand [PF13202.6]; EF-hand domain [PF13405.6]; EF-hand domain pair [PF13499.6]; FAD-binding domain [PF08022.12]; Ferric reductase like transmembrane component…		1B	45	4.29e-06	86.667	591117544	TraesCS1B02G362200	[CC] integral component of membrane [GO:0016021]; [MF] calcium ion binding [GO:0005509]; [MF] oxidoreductase activity, acting on NAD(P)H, oxygen as acceptor [GO:0050664]; [MF] peroxidase activity [GO:0004601]	EF-hand like superfamily [CL0220]; Ferredoxin / Ferric reductase-like NAD binding [CL0091]; Riboflavin synthase/Ferredoxin reductase FAD binding domain [CL0076]; Transmembrane di-heme cytochrome superfamily [CL0328]; EF hand [PF00036.32]; EF hand [PF13202.6]; EF-hand domain [PF13405.6]; EF-hand domain pair [PF13499.6]; FAD-binding domain [PF08022.12]; Ferric reductase like transmembrane component…
32	32|WEP|100014148_F_0	3B	75	1.71e-17	86.667	166709807	TraesCS3B02G166800	[BP] pollen tube growth [GO:0009860]; [BP] regulation of stomatal opening [GO:1902456]; [BP] stomatal movement [GO:0010118]; [CC] Golgi apparatus [GO:0005794]; [CC] pollen tube [GO:0090406]; [MF] dihydroceramidase activity [GO:0071633]	Protein of unknown function (DUF616) [PF04765.13]
33	33|WEP|100066878_F_0	4B	23	1.2	95.652	7398154					5B	27	4	88.889	137119151
34	34|WEP|100069132_F_0	1B	68	4.28e-25	98.529	678260419	TraesCS1B02G469300	[MF] zinc ion binding [GO:0008270]	Cytidine deaminase-like (CDA) superfamily [CL0109]; Tetratrico peptide repeat superfamily [CL0020]; DYW family of nucleic acid deaminases [PF14432.6]; PPR repeat [PF01535.20]; PPR repeat [PF12854.7]; PPR repeat family [PF13041.6]; Pentatricopeptide repeat domain [PF13812.6]; Pentacotripeptide-repeat region of PRORP [PF17177.4]		2B	37	0.094	86.486	37543535

## Sheet: D genome
		Wheat Genome "D" Hit #1									Wheat Genome "D" Hit #2
QTL	marker id	chr	aln length	e-value	identity	start	gene	go	pfam		chr	aln length	e-value	identity	start	gene	go	pfam
1	1|BG|100022501_F_0	4D	69	9.6e-26	98.551	19676592	TraesCS4D02G042000	[CC] integral component of membrane [GO:0016021]	MAPEG family [PF01124.18]		1D	22	3.1	95.455	40797309	TraesCS1D02G060600	[CC] integral component of membrane [GO:0016021]; [MF] transmembrane transporter activity [GO:0022857]	APC superfamily [CL0062]; Permease family [PF00860.20]
2	2|Protein|100013840_F_0	5D	74	5.31e-10	81.081	520860479					7D	25	0.9	92	164183872	TraesCS7D02G206700	[MF] ATP binding [GO:0005524]; [MF] histone binding [GO:0042393]	P-loop containing nucleoside triphosphate hydrolase superfamily [CL0023]; DEAD/DEAH box helicase [PF00270.29]; DEAD_2 [PF06733.15]; Helicase conserved C-terminal domain [PF00271.31]; Type III restriction enzyme, res subunit [PF04851.15]; Snf2-ATP coupling, chromatin remodelling complex [PF14619.6]; SNF2 family N-terminal domain [PF00176.23]
3	3|BG|100079925_F_0	1D	69	9.6e-26	98.551	284047521	TraesCS1D02G201200	[CC] integral component of membrane [GO:0016021]; [MF] transmembrane transporter activity [GO:0022857]	Major Facilitator Superfamily [CL0015]; POT family [PF00854.21]		7D	35	4.09e-05	94.286	74418164	TraesCS7D02G119800	[CC] integral component of membrane [GO:0016021]; [MF] transmembrane transporter activity [GO:0022857]	Major Facilitator Superfamily [CL0015]; Major Facilitator Superfamily [PF07690.16]; Penicillin-binding protein N-terminus [PF17093.5]; POT family [PF00854.21]
4	4|WEP|100001630_F_0	6D	50	4.66e-17	100	460284763					1D	32	0.000143	93.75	415646727	TraesCS1D02G323000
5	5|WEP|100011893_F_0	2D	59	6.06e-22	100	610043745	TraesCS2D02G521300	[MF] metal ion binding [GO:0046872]; [MF] oxidoreductase activity [GO:0016491]	Cupin fold [CL0029]; 2OG-Fe(II) oxygenase superfamily [PF03171.20]; non-haem dioxygenase in morphine synthesis N-terminal [PF14226.6]		3D	50	2.75e-07	86	35253322	TraesCS3D02G074300	[MF] metal ion binding [GO:0046872]; [MF] oxidoreductase activity [GO:0016491]	Cupin fold [CL0029]; 2OG-Fe(II) oxygenase superfamily [PF03171.20]; non-haem dioxygenase in morphine synthesis N-terminal [PF14226.6]
6	6|Protein|100074730_F_0	1D	63	1.74e-22	98.413	66381765					7D	63	6.47e-09	82.54	578467945
7	7|TP|100016211_F_0	2D	43	1.25e-11	97.674	627238090	TraesCS2D02G551900		Endosomal sorting complex assembly domain [CL0596]; Tetratrico peptide repeat superfamily [CL0020]; PPR repeat [PF01535.20]; PPR repeat [PF12854.7]; PPR repeat family [PF13041.6]; Pentatricopeptide repeat domain [PF13812.6]; Pentacotripeptide-repeat region of PRORP [PF17177.4]; Tetratricopeptide repeat [PF13428.6]; Tetratricopeptide repeat [PF14559.6]; Tetratricopeptide repeat [PF14561.6]; Vps23 …		5D	28	0.26	92.857	235421089
8	8|TP|100030135_F_0	5D	69	9.6e-26	98.551	376442915	TraesCS5D02G273500	[BP] transcription, DNA-templated [GO:0006351]; [MF] DNA-binding transcription factor activity [GO:0003700]; [MF] sequence-specific DNA binding [GO:0043565]	bZIP-like leucine zipper [CL0018]; bZIP transcription factor [PF00170.21]; Basic region leucine zipper [PF07716.15]; Seed dormancy control [PF14144.6]; Nuclear receptor-binding factor 2, autophagy regulator [PF08961.10]		7D	40	0.002	87.5	397582919	TraesCS7D02G313800	[BP] translational elongation [GO:0006414]; [CC] ribosome [GO:0005840]; [MF] structural constituent of ribosome [GO:0003735]	dUTPase like superfamily [CL0153]; Cytomegalovirus UL84 protein [PF06284.11]; Domain of unknwon function (DUF3824) [PF12868.7]; Bacteriophage holin of superfamily 6 (Holin_LLH) [PF09682.10]; 60s Acidic ribosomal protein [PF00428.19]
9	9|Protein|100054424_F_0	2D	55	3.82e-18	98.182	588736717	TraesCS2D02G489800		F-box-like domain [CL0271]; STAS domain superfamily [CL0502]; FBD [PF08387.10]; F-box domain [PF00646.33]; F-box-like [PF12937.7]; STAS domain [PF13466.6]		3D	26	0.021	96.154	520154365	TraesCS3D02G405600		F-box-like domain [CL0271]; Leucine Rich Repeat [CL0022]; FBD [PF08387.10]; F-box domain [PF00646.33]; F-box-like [PF12937.7]; Leucine Rich Repeat [PF07723.13]
10	10|Protein|100033763_F_0	4D	55	3.82e-18	98.182	97439847					5D	54	3.1	74.074	30421457	TraesCS5D02G032800		FtsL-like superfamily [CL0225]; Autophagy protein Apg17 [PF04108.12]; Autophagy protein 16 (ATG16) [PF08614.11]; Protein of unknown function (DUF1664) [PF07889.12]; Domain of unknown function (DUF4600) [PF15372.6]; Homeobox associated leucine zipper [PF02183.18]; Ciliary rootlet component, centrosome cohesion [PF15035.6]; SWI5-dependent HO expression protein 3 [PF17078.5]; Cell division protein Z…
11	11|Protein|100016524_F_0	7D	51	5.67e-16	98.039	504250550	TraesCS7D02G389000		Tetratrico peptide repeat superfamily [CL0020]; PPR repeat [PF01535.20]; PPR repeat [PF12854.7]; PPR repeat family [PF13041.6]; Pentatricopeptide repeat domain [PF13812.6]; Pentacotripeptide-repeat region of PRORP [PF17177.4]; Tetratricopeptide repeat [PF13428.6]		1D	26	0.26	92.308	255015686
12	12|WEP|100024379_F_0	3D	39	4.36e-11	100	474215814	TraesCS3D02G360500	[CC] nucleus [GO:0005634]; [MF] DNA binding [GO:0003677]	Helix-turn-helix clan [CL0123]; Myb-like DNA-binding domain [PF13921.6]; Myb DNA-binding like [PF15963.5]; Myb-like DNA-binding domain [PF00249.31]; SLIDE [PF09111.10]; TEA/ATTS domain [PF01285.18]		6D	33	0.26	87.879	456114278
13	13|Protein|100013808_F_0	5D	68	2.11e-21	94.118	452563213	TraesCS5D02G383000	[MF] DNA-binding transcription factor activity [GO:0003700]	CCAAT-binding transcription factor (CBF-B/NF-YA) subunit B [PF02045.15]
14	14|WEP|100009067_F_0	1D	57	3.14e-19	98.246	347409681	TraesCS1D02G255100	[BP] terpenoid biosynthetic process [GO:0016114]; [MF] 1-deoxy-D-xylulose-5-phosphate synthase activity [GO:0008661]	Thiamin diphosphate-binding superfamily [CL0254]; Transketolase C-terminal domain-like superfamily [CL0591]; 1-deoxy-D-xylulose-5-phosphate synthase [PF13292.6]; Dehydrogenase E1 component [PF00676.20]; Thiamine pyrophosphate enzyme, C-terminal TPP binding domain [PF02775.21]; Transketolase, pyrimidine binding domain [PF02779.24]; Transketolase, C-terminal domain [PF02780.20]; Transketolase, thia…		2D	56	9.61e-07	82.143	639628928	TraesCS2D02G575800	[BP] terpenoid biosynthetic process [GO:0016114]; [MF] 1-deoxy-D-xylulose-5-phosphate synthase activity [GO:0008661]	Thiamin diphosphate-binding superfamily [CL0254]; Transketolase C-terminal domain-like superfamily [CL0591]; 1-deoxy-D-xylulose-5-phosphate synthase [PF13292.6]; Dehydrogenase E1 component [PF00676.20]; Thiamine pyrophosphate enzyme, C-terminal TPP binding domain [PF02775.21]; Transketolase, pyrimidine binding domain [PF02779.24]; Transketolase, C-terminal domain [PF02780.20]; Transketolase, thia…
15	15|WEP|100027188_F_0	7D	64	4.97e-23	98.438	266874929	TraesCS7D02G277700		Plant protein of unknown function (DUF868) [PF05910.12]		3D	19	3.1	100	412325571
16	16|WEP|100015451_F_0	1D	55	7.89e-08	83.636	394276938	TraesCS1D02G296000	[MF] zinc ion binding [GO:0008270]	TRAF domain-like superfamily [CL0389]; Seven in absentia protein family [PF03145.16]		7D	24	0.26	95.833	611764768
17	17|WEP|100013669_F_0	3D	67	7.38e-21	94.03	373832579	TraesCS3D02G269100	[CC] integral component of membrane [GO:0016021]	Family A G protein-coupled receptor-like superfamily [CL0192]; Lung seven transmembrane receptor [PF06814.13]		4D	25	0.9	92	465608727	TraesCS4D02G295900		CCT like-motif [CL0281]; Divergent CCT motif [PF09425.10]; tify domain [PF06200.14]
18	18|WEP|100033114_F_0	7D	49	1.63e-16	100	140232664	TraesCS7D02G187600	[MF] DNA-binding transcription factor activity [GO:0003700]	Peptidase clan AD [CL0130]; Stress-induced protein Di19, C-terminal [PF14571.6]; Mediator complex subunit 3 fungal [PF11593.8]; Presenilin [PF01080.17]; TCP family transcription factor [PF03634.13]		6D	49	0.002	81.633	393936188	TraesCS6D02G285600	[MF] DNA-binding transcription factor activity [GO:0003700]	Dimeric alpha/beta barrel superfamily [CL0032]; Ubiquitin superfamily [CL0072]; Domain of unknown function (DUF4430) [PF14478.6]; Mediator complex subunit 3 fungal [PF11593.8]; L-rhamnose mutarotase [PF05336.13]; Spt20 family [PF12090.8]; TCP family transcription factor [PF03634.13]; Transcription factor IIA, alpha/beta subunit [PF03153.13]
19	19|WEP|100006546_F_0	6D	69	1.63e-16	88.406	86013961					7D	24	3.1	95.833	414934989
20	20|WEP|100030958_F_0	6D	34	1.17e-05	94.118	289220221					7D	32	0.9	87.5	366500681
21	21|WEP|100041833_F_0
22	22|WEP|100001948_F_0	3D	47	8.42e-14	97.872	100394886	TraesCS3D02G139900
23	23|WEP|100010676_F_0	1D	55	2.41e-14	92.727	233930539	TraesCS1D02G163800	[BP] response to abscisic acid [GO:0009737]	Frizzled cysteine-rich domain-related superfamily [CL0644]; Glypican [PF01153.19]		6D	69	1.17e-05	76.812	471568777	TraesCS6D02G403400	[BP] response to abscisic acid [GO:0009737]	Glycoside hydrolase/deacetylase superfamily [CL0158]; Uncharacterized protein conserved in bacteria (DUF2334) [PF10096.9]
24	24|WEP|100001383_F_0	3D	53	5.67e-16	96.226	109554106	TraesCS3D02G145600	[CC] integral component of membrane [GO:0016021]	SGNH hydrolase superfamily [CL0264]; GDSL/SGNH-like Acyl-Esterase family found in Pmr5 and Cas1p [PF13839.6]; PMR5 N terminal Domain [PF14416.6]		7D	53	0.002	79.245	421363875	TraesCS7D02G329600		SGNH hydrolase superfamily [CL0264]; GDSL/SGNH-like Acyl-Esterase family found in Pmr5 and Cas1p [PF13839.6]; PMR5 N terminal Domain [PF14416.6]; TRSP domain C terminus to PRTase_2 [PF12500.8]
25	25|WEP|100070301_F_0	2D	55	3.82e-18	98.182	175592433	TraesCS2D02G214200	[MF] magnesium-dependent protein serine/threonine phosphatase activity [GO:0004724]; [MF] protein serine/threonine phosphatase activity [GO:0004722]	PP2C-like superfamily [CL0238]; Protein phosphatase 2C [PF00481.21]		6D	21	0.26	100	447901468
26	26|WEP|100036161_F_0	3D	40	6.47e-09	95	371093989	TraesCS3D02G267200		Protein of unknown function (DUF1639) [PF07797.14]		5D	29	0.000498	96.552	548485069	TraesCS5D02G534400	[MF] catalytic activity [GO:0003824]	PLP dependent aminotransferase superfamily [CL0061]; Aminotransferase class I and II [PF00155.21]; Aminotransferase class-V [PF00266.19]; Beta-eliminating lyase [PF01212.21]; Cys/Met metabolism PLP-dependent enzyme [PF01053.20]; DegT/DnrJ/EryC1/StrS aminotransferase family [PF01041.17]; Orn/Lys/Arg decarboxylase, major domain [PF01276.20]; Orn/Lys/Arg decarboxylase, C-terminal domain [PF03711.15]…
27	27|WEP|100009019_F_0	6D	57	3.14e-19	98.246	433938510	TraesCS6D02G330900	[CC] integral component of membrane [GO:0016021]; [MF] ligand-gated ion channel activity [GO:0015276]	Ion channel (VIC) superfamily [CL0030]; Periplasmic binding protein clan [CL0177]; Periplasmic binding protein like [CL0144]; Receptor family ligand binding region [PF01094.28]; Ligand-gated ion channel [PF00060.26]; Ligated ion channel L-glutamate- and glycine-binding site [PF10613.9]; Periplasmic binding protein domain [PF13433.6]; Periplasmic binding protein [PF13458.6]; Bacterial extracellula…		2D	57	5.31e-10	85.965	568250494	TraesCS2D02G462300	[CC] integral component of membrane [GO:0016021]; [CC] plasma membrane [GO:0005886]; [MF] ligand-gated ion channel activity [GO:0015276]	Ion channel (VIC) superfamily [CL0030]; Periplasmic binding protein clan [CL0177]; Periplasmic binding protein like [CL0144]; Receptor family ligand binding region [PF01094.28]; Ligand-gated ion channel [PF00060.26]; Ligated ion channel L-glutamate- and glycine-binding site [PF10613.9]; Periplasmic binding protein [PF13458.6]; Bacterial extracellular solute-binding proteins, family 3 [PF00497.20]…
28	28|WEP|100024849_F_0	6D	69	9.6e-26	98.551	78753012	TraesCS6D02G112100	[BP] cellulose catabolic process [GO:0030245]; [MF] cellulase activity [GO:0008810]	Six-hairpin glycosidase superfamily [CL0059]; Glycosyl hydrolase family 9 [PF00759.19]		7D	65	3.82e-18	92.308	159736761	TraesCS7D02G201000	[BP] cellulose catabolic process [GO:0030245]; [MF] cellulase activity [GO:0008810]	Six-hairpin glycosidase superfamily [CL0059]; Glycosyl hydrolase family 9 [PF00759.19]
29	29|WEP|100010471_F_0	6D	69	1.17e-24	97.101	288538199					5D	22	3.1	95.455	555680168
30	30|WEP|100005191_F_0	4D	62	1.42e-23	100	497240058	TraesCS4D02G339900		Cupin fold [CL0029]; Shuttling between cyosol and Golgi, peripheral membrane family [CL0456]; 2OG-Fe(II) oxygenase superfamily [PF03171.20]; non-haem dioxygenase in morphine synthesis N-terminal [PF14226.6]; Dyggve-Melchior-Clausen syndrome protein [PF09742.9]		6D	62	0.002	75.806	420694832	TraesCS6D02G310700	[MF] metal ion binding [GO:0046872]; [MF] oxidoreductase activity [GO:0016491]	Cupin fold [CL0029]; 2OG-Fe(II) oxygenase superfamily [PF03171.20]; non-haem dioxygenase in morphine synthesis N-terminal [PF14226.6]
31	31|WEP|100006760_F_0	3D	57	2.41e-14	92.982	388337766	TraesCS3D02G279900	[CC] integral component of membrane [GO:0016021]; [MF] calcium ion binding [GO:0005509]; [MF] oxidoreductase activity, acting on NAD(P)H, oxygen as acceptor [GO:0050664]; [MF] peroxidase activity [GO:0004601]	EF-hand like superfamily [CL0220]; Ferredoxin / Ferric reductase-like NAD binding [CL0091]; Riboflavin synthase/Ferredoxin reductase FAD binding domain [CL0076]; Transmembrane di-heme cytochrome superfamily [CL0328]; EF hand [PF00036.32]; EF hand [PF13202.6]; EF-hand domain [PF13405.6]; EF-hand domain pair [PF13499.6]; FAD-binding domain [PF08022.12]; Ferric reductase like transmembrane component…		1D	45	3.35e-06	86.667	436197253	TraesCS1D02G350600	[CC] integral component of membrane [GO:0016021]; [MF] calcium ion binding [GO:0005509]; [MF] oxidoreductase activity, acting on NAD(P)H, oxygen as acceptor [GO:0050664]; [MF] peroxidase activity [GO:0004601]	EF-hand like superfamily [CL0220]; Ferredoxin / Ferric reductase-like NAD binding [CL0091]; Riboflavin synthase/Ferredoxin reductase FAD binding domain [CL0076]; Transmembrane di-heme cytochrome superfamily [CL0328]; EF hand [PF00036.32]; EF hand [PF13202.6]; EF-hand domain [PF13405.6]; EF-hand domain pair [PF13499.6]; FAD-binding domain [PF08022.12]; Ferric reductase like transmembrane component…
32	32|WEP|100014148_F_0	3D	68	1.74e-22	95.588	114081185	TraesCS3D02G149100		Protein of unknown function (DUF616) [PF04765.13]		7D	24	3.1	91.667	568800291
33	33|WEP|100066878_F_0	4D	69	3.82e-18	89.855	4471572					7D	27	3.1	88.889	281712642
34	34|WEP|100069132_F_0	1D	68	7.88e-27	100	487169431	TraesCS1D02G443000	[MF] zinc ion binding [GO:0008270]	Cytidine deaminase-like (CDA) superfamily [CL0109]; Tetratrico peptide repeat superfamily [CL0020]; DYW family of nucleic acid deaminases [PF14432.6]; PPR repeat [PF01535.20]; PPR repeat [PF12854.7]; PPR repeat family [PF13041.6]; Pentatricopeptide repeat domain [PF13812.6]; Pentacotripeptide-repeat region of PRORP [PF17177.4]		7D	23	0.9	95.652	25818770	TraesCS7D02G050300	[MF] chaperone binding [GO:0051087]	Tetratrico peptide repeat superfamily [CL0020]; Ubiquitin superfamily [CL0072]; BAG domain [PF02179.16]; Yeast cortical protein KAR9 [PF08580.10]; Ras-mediated vulval-induction antagonist [PF03353.15]; Nucleopolyhedrovirus capsid protein P87 [PF07267.11]; PB1 domain [PF00564.24]; Suppressor of forked protein (Suf) [PF05843.14]; Transcription factor IIA, alpha/beta subunit [PF03153.13]; Ubiquitin …
